# 1 Atoh7-independent specification of retinal ganglion cell 2 identity

3  
4  
5 Justin Brodie-Kommit(1), Brian S. Clark(2)(3), Qing Shi(4,13), Fion Shiau(2), Dong Won  
6 Kim(5), Jennifer Langel(9), Catherine Sheely(1), Tiffany Schmidt(10), Tudor Badea(12),  
7 Thomas Glaser(11), Haiqing Zhao(1), Joshua Singer(4), Seth Blackshaw(5-8)\*, Samer  
8 Hattar(9)\*

9  
10

## 11 **Affiliations:**

- 12 1. Department of Biology, Johns Hopkins University, Baltimore, MD, USA
- 13 2. John F. Hardesty, MD, Department of Ophthalmology and Visual Sciences,  
14 Washington University School of Medicine, St. Louis, MO, USA
- 15 3. Department of Developmental Biology, Washington University School of  
16 Medicine, St. Louis, MO, USA
- 17 4. Department of Biology, University of Maryland, College Park, MD, United States
- 18 5. Department of Neuroscience, Johns Hopkins University School of Medicine,  
19 Baltimore, MD, USA
- 20 6. Department of Neurology, Johns Hopkins University School of Medicine,  
21 Baltimore, MD, USA
- 22 7. Department of Ophthalmology, Johns Hopkins University School of Medicine,  
23 Baltimore, MD, USA
- 24 8. Kavli Neuroscience Discovery Institute, Johns Hopkins University, Baltimore, MD,  
25 USA
- 26 9. National Institute of Mental Health (NIMH), National Institutes of Health (NIH),  
27 Bethesda, MD, USA.
- 28 10. Department of Neurobiology, Northwestern University, Evanston, IL 60208
- 29 11. Department of Cell Biology & Human Anatomy, University of California, Davis  
30 School of Medicine, Davis CA, USAs

- 31 12. National Eye Institute, National Institutes of Health, Bethesda, MD, USA.
- 32 13. Present address: Department of Chemical Physiology and Biochemistry, Oregon
- 33 Health & Science University, Portland OR, USA
- 34 \* To whom correspondence should be addressed: [samer.hattar@nih.gov](mailto:samer.hattar@nih.gov),
- 35 [sblack@jhmi.edu](mailto:sblack@jhmi.edu)

36 **Abstract**

37 Retinal ganglion cells (RGCs), which relay visual information from the eye to the brain,  
38 are the first cell type generated during retinal neurogenesis. Loss of function of the  
39 transcription factor *Atoh7*, which is expressed in multipotent early neurogenic retinal  
40 progenitor cells, leads to a selective and near complete loss of RGCs. *Atoh7* has thus  
41 been considered essential for conferring competence on progenitors to generate RGCs.  
42 However, when apoptosis is inhibited in *Atoh7*-deficient mice by loss of function of *Bax*,  
43 only a modest reduction in RGC number is observed. Single-cell RNA-Seq of  
44 *Atoh7*;*Bax*-deficient retinas shows that RGC differentiation is delayed, but that RGC  
45 precursors are grossly normal. *Atoh7*;*Bax*-deficient RGCs eventually mature, fire action  
46 potentials, and incorporate into retinal circuitry, but exhibit severe axonal guidance  
47 defects. This study reveals an essential role for *Atoh7* in RGC survival, and  
48 demonstrates *Atoh7*-independent mechanisms for RGC specification.

## 49 **Introduction**

50 The retina has six major classes of neurons that develop from a common progenitor cell  
51 pool during overlapping temporal intervals. Retinal ganglion cells (RGCs), the only  
52 projection neurons from the retina to the brain, are the first retinal cell type to be  
53 generated. RGC development in both zebrafish, mice, and humans has been shown to  
54 require the basic helix-loop-helix transcription factor atonal homolog 7 - *Atoh7* (*Math5*)  
55 (Brown et al., 2001; Ghiasvand et al., 2011; Jarman et al., 1994; Khan et al., 2011; Khor  
56 et al., 2011; Macgregor et al., 2010; Prasov et al., 2012; Wang et al., 2001). *Atoh7* is  
57 conserved across all vertebrate species, and distantly related to *atonal*, which specifies  
58 the earliest-born neurons in *Drosophila* retina (Brown et al., 2001; Jarman et al., 1994;  
59 Kanekar et al., 1997; Prasov et al., 2012). *Atoh7*-deficient mice and zebrafish lack  
60 upwards of 95% of RGCs (Brown et al., 2001; Brzezinski et al., 2012; Kay et al., 2001;  
61 Wang et al., 2001) and likewise lack any visible optic nerve or functional connections  
62 from the retina to the brain (Brzezinski et al., 2005; Wee et al., 2002). Human mutations  
63 in *ATOH7* or its cis-regulatory regions have been associated with optic nerve agenesis  
64 or hypoplasia (Khan et al., 2012; Macgregor et al., 2010) and increased susceptibility to  
65 glaucoma (Fan et al., 2011; Ramdas et al., 2011) . *Atoh7*-deficiency also disrupts  
66 development of retinal vasculature in both mice and humans, likely as an indirect result  
67 of the loss of RGCs (Edwards et al., 2012).

68 In mice, *Atoh7* is expressed in neurogenic retinal progenitor cells (RPCs)  
69 between E12 and P0, corresponding to the interval in which RGCs are generated  
70 (Brown et al., 1998; Clark et al., 2019; Feng et al., 2010; Pacal and Bremner, 2014;  
71 Prasov and Glaser, 2012; Rapaport et al., 2004; Sidman, 1960; Wang et al., 2001;  
72 Young, 1985). Upon cell fate specification, *Atoh7* expression is rapidly down-regulated  
73 in mouse RGC precursors (Clark et al., 2019; Miesfeld et al., 2018a) although  
74 expression persists in immature human RGCs (Aparicio et al., 2017; Lu et al., 2020).  
75 Genetic fate mapping indicates that *Atoh7*-expressing RPCs also give rise to other  
76 early-born retinal cells, including cone photoreceptors, horizontal and amacrine cells,  
77 and that generation of these cell types is increased in *Atoh7*-deficient mice (Brown et  
78 al., 2001; Brzezinski et al., 2005; Hufnagel et al., 2013; Wang et al., 2001). Ectopic  
79 expression of *Atoh7* alone, however, typically is not sufficient to drive RGC specification



80 (Gan et al., 1999; Hufnagel et al., 2013; Mao et al., 2013, 2008; Ohnuma et al., 2002;  
81 Pan et al., 2008; Pittman et al., 2008; Prasov and Glaser, 2012; Wu et al., 2015),  
82 although misexpression of *Atoh7* in Crx-expressing photoreceptor precursors was  
83 sufficient to rescue development of a limited number of RGCs (Prasov and Glaser,  
84 2012).

85 These findings have suggested that *Atoh7* acts in neurogenic RPCs to confer  
86 competence to generate RGCs (Brzezinski et al., 2012; Mu et al., 2005; Yang et al.,  
87 2003) potentially in combination with as yet unidentified factors. Recent experiments  
88 have shown that when *Pou4f2* and *Isl1* are misexpressed under the control of the  
89 endogenous *Atoh7* promoter, this is sufficient to fully rescue the defects in RGC  
90 development seen in *Atoh7* mutants (Gan et al., 1999; Pan et al., 2008; Wu et al.,  
91 2015). This implies that *Atoh7* may act permissively to enable expression of these two  
92 factors in early-stage RPCs.

93 Other data, however, suggest that *Atoh7* may not be essential for RGC  
94 specification. Previous studies indicate that immature RGCs are present in *Atoh7*-  
95 deficient mice in embryonic retina, although at reduced numbers relative to controls  
96 (Brown et al., 2001; Brzezinski et al., 2012). Genetic fate mapping studies further raise  
97 questions about the necessity of *Atoh7* for RGC specification. Analysis of *Atoh7-Cre*  
98 knock-in mice reveal that only 55% of all RGCs are generated from *Atoh7*-expressing  
99 RPCs (Brzezinski et al., 2012; Feng et al., 2010; Poggi et al., 2005). Although this  
100 outcome may reflect inefficient activation of Cre-dependent reporter constructs, it may  
101 also imply that a subset of RGCs are specified through an *Atoh7*-independent  
102 mechanism that requires trophic support from *Atoh7*-expressing RPCs or *Atoh7*-derived  
103 RGCs.

104 To distinguish the role of *Atoh7* in controlling RGC specification and survival, we  
105 prevented RGC death in *Atoh7*-deficient mice by simultaneously inactivating the  
106 proapoptotic gene *Bax* (Chen et al., 2013; Knudson et al., 1995). Strikingly, we  
107 observed only a 25.2±0.9% reduction in adult RGC numbers in *Atoh7<sup>-/-</sup>;Bax<sup>-/-</sup>* retinas  
108 relative to *Bax<sup>-/-</sup>* controls. While mutant RGCs showed severe defects in formation of  
109 axonal projections and retinal vasculature, we found that ‘rescued’ RGCs expressed  
110 both *Pou4f2* and *Isl1* in addition to other markers of terminal differentiation, fired action

111 potentials in response to light, and formed functional synapses with retinal neurons.  
112 Single-cell RNA-Sequencing (scRNA-Seq) analysis of *Atoh7*;*Bax*-deficient retinas  
113 shows that although RGC differentiation is delayed relative to wildtype, *Atoh7*-deficient  
114 RGCs express both *Pou4f2* and *Isl1*. This study demonstrates that, while *Atoh7* is  
115 required for both terminal differentiation and survival of RGCs, it is not necessary for  
116 specification of the majority of RGCs.

117

118

## 119 **Experimental Procedures**

120

### 121 **Mice**

122 Animals were housed and treated in accordance with NIH and IACUC guidelines, and  
123 used protocols approved by the Johns Hopkins University Animal Care and Use  
124 Committee (Protocol numbers MO16A212). *Atoh7*<sup>Cre/Cre</sup> mice are a knock-in line where  
125 Cre recombinase replaced the entire *Atoh7* gene and was a gift from Dr. Lin Gan  
126 (referred to as *Atoh7*<sup>-/-</sup>) (Yang et al., 2003) (RRID:MGI:3717726). The *Bax*<sup>tm1Sjk/tm1Sjk</sup>  
127 (*Bax*<sup>-/-</sup>) mice containing a neomycin cassette that replaces critical exons 2-5, were  
128 purchased from The Jackson Laboratory (Knudson et al., 1995)(JAX:002994,  
129 RRID:IMSR\_JAX:002994). The *Bax*<sup>-/-</sup> mice are unpigmented since the *Bax* gene is  
130 linked to the *Tyrosinase* (*Tyr*) and *Pink-eyed dilution* (*p*) gene by 21cM and 5cM  
131 respectively. The conditional *Bax*<sup>tm2Sjk/tm2Sjk</sup> (*Bax*<sup>fl/fl</sup>) mice containing a LoxP sites  
132 flanking exons 2-4, were purchased from The Jackson Laboratory (JAX:006329,  
133 RRID:IMSR\_JAX:006329) (Takeuchi et al., 2005). *Atoh7*<sup>tTA/tTA</sup>;B&I-EE mice are a  
134 combination of two genetic strains. In the first strain (*Atoh7*<sup>tTA/tTA</sup>), the tetracycline-  
135 responsive artificial transcription factor tTA replaces the *Atoh7* gene. In the absence of  
136 tetracycline, the tTA activates the tetracycline responsive element which is driving the  
137 expression of *Brn3b* and *Isl1* in the second strain (B&I-EE). Therefore, in effect the  
138 *Atoh7* promoter will drive the expression of *Brn3b* and *Isl1*. This mouse line has been  
139 previously reported to rescue all reported effects of *Atoh7* loss of function, and was a  
140 gift from Dr. Xiuqian Mu (Wu et al., 2015)(MGI:5749708 and MGI:5749713). The  
141 *Crx*>*Atoh7* mice, a transgene that expresses the full-length *Atoh7* coding sequence

142 under the control of the *Crx* promoter, was previously published (Prasov and Glaser,  
143 2012) (MGI:5433215). A tdTomato Cre recombinase reporter mouse *Rosa26<sup>tdTomAi14</sup>*  
144 (JAX:007914, RRID:IMSR\_JAX:007914) (Madisen et al., 2010) was used to label cells  
145 in a Cre recombinase-dependent manner. The *Chx10-Cre* mouse line is a transgenic  
146 line purchased from The Jackson Laboratory, originally developed by Constance  
147 Cepko's laboratory (JAX:005105, RRID:IMSR\_JAX:005105) (Rowan and Cepko, 2004),  
148 expresses Cre recombinase broadly in all retinal progenitor cells from E10-E15.5. The  
149 *Opn4<sup>taulacZ</sup>* mice were used to trace the ipRGC projections to the brain (Hattar et al.,  
150 2002). Throughout the manuscript, controls are heterozygous for both *Atoh7* and *Bax*  
151 (*Atoh7<sup>+/-</sup>;Bax<sup>+/-</sup>*), whereas *Atoh7<sup>-/-</sup>* mice were also are heterozygous for *Bax* (*Atoh7<sup>-/-</sup>;*  
152 *Bax<sup>+/-</sup>*).

153

#### 154 **Statistics**

155 All statistical tests, apart from analysis of the scRNA-seq data, were performed in  
156 Graphpad Prism 6 (RRID:SCR\_002798). The statistical tests used are listed in figure  
157 captions.

158

#### 159 **Immunohistochemistry**

160 Adult retinas from P40-P200 mice were obtained from by enucleating whole eyes, fixing  
161 for 30 minutes in 4% paraformaldehyde (PFA) diluted in PBS, dissecting to remove the  
162 cornea and lens, dissecting the retina from the RPE, and antibody staining proceeded in  
163 a 24-Multiwell Cell Culture Plate (Corning #353047). Retinas were blocked in 500  $\mu$ l of  
164 PBS containing 0.3% Triton X100 and 6% goat serum for 2 hours at room temperature.  
165 Several antibodies were used in this study (dilutions are between brackets): Mouse  
166 IgG1 anti-Brn3a (Millipore Cat# MAB1585 RRID:AB\_94166) (1:250), Rabbit anti-  
167 RBPMS (GeneTex Cat# GTX118619 RRID:AB\_10720427) (1:250), Rabbit anti Brn3b  
168 (Badea et al., 2009) (1:100), Mouse anti-Smi32 (non-phosphorylated anti-Neurofilament  
169 H (NF-H)) (BioLegend Cat# 801701 RRID:AB\_2564642) (1:500), Mouse anti  
170 Neurofilament Medium (Thermo Fisher Scientific Cat# 13-0700, RRID:AB\_2532998)  
171 (1:500), Chicken anti Neurofilament Heavy (Millipore Cat# AB5539,  
172 RRID:AB\_11212161) (1:250), Mouse anti-GFAP (Sigma-Aldrich Cat# C9205

173 RRID:AB\_476889) (1:1000), GS-IB4 (Molecular Probes Cat# I21411 also I21411  
174 RRID:AB\_2314662) (1:250), Rabbit anti-Pax2 (BioLegend Cat# 901001  
175 RRID:AB\_2565001) (1:100), Mouse anti-Tuj1 (R and D Systems Cat# MAB1195  
176 RRID:AB\_357520) (1:200), Rabbit anti DsRed Takara Bio (Cat# 632496,  
177 RRID:AB\_10013483) (1:250), Mouse anti-Islet1 (DSHB Cat# 40.2D6 RRID:AB\_528315)  
178 (1:200), and Rabbit anti-Opn4 (Advanced Targeting Systems Cat# UF006,  
179 RRID:AB\_2314781) (1:500). The appropriate antibodies were diluted in blocking  
180 solution and incubated for two days at 4°C. Retinas were then washed in three changes  
181 of PBS, 15 minutes each, then placed in the appropriate Alexa Fluor secondary  
182 antibody (Invitrogen) (1:500) overnight at 4°C. Retinas were washed in 200 µl of PBS  
183 containing 1xDAPI, then washed three times in PBS for 15 minutes each, and mounted  
184 flat on slides in VectaShield (Vector Labs, RRID:AB\_2336789). Regionalized dissections  
185 were done as follows; before enucleation, the most nasal part of the sclera was marked  
186 with a cauterizer. This mark was used during the dissection to make a marking incision  
187 into the retina, following the above staining protocol. Retinas were imaged on a Zeiss  
188 LSM 700 or 800 Confocal at the Johns Hopkins University Integrated Imaging Center  
189 Core Facility (RRID:SCR\_016187).

190 For embryonic studies, developing embryos harvested at E12.5 and E14.5 were  
191 washed in a Petri dish with sterile PBS three times for 10 minutes. Tail was used for  
192 genotyping. The heads were fixed in 4% PFA for 30 minutes and then cryoprotected in  
193 30% sucrose at 4°C overnight, frozen in OCT, and sectioned at 18 µm thickness using a  
194 cryostat. Sections were dried at 30°C for 15 minutes and then washed 10 minutes in  
195 three changes of PBS. Sections were then blocked and stained as above in a  
196 humidified chamber overnight. Sections were then mounted and imaged as described.

197

### 198 **Cell density analysis**

199 All cell counting was done manually. To confirm the reproducibility of the cell counts,  
200 randomly selected selections from each sample were counted twice, and counts were  
201 consistently found to be essentially identical. Density was calculated as the number of  
202 cells per area. All measurements and cell number analysis was done manually in  
203 ImageJ (Fiji, RRID:SCR\_002285) and Adobe Photoshop CS6 (RRID:SCR\_014199).

204 In adult flat-mounted retinas, density of RGCs was calculated by obtaining at  
205 least 4 representative images at 40x of 600  $\mu\text{m}$  x 600  $\mu\text{m}$  with 1  $\mu\text{m}$  optical sections.  
206 Optical sections were projected together with maximum intensity, including cells only in  
207 the retinal layers of interest. Representative images were taken similarly across all  
208 genotypes without *a priori* knowledge of the genotype. However, some genotypes  
209 contain marked phenotypic differences, which include a pigment mutation linked to the  
210 *Bax* locus, drastic RGC number reduction as in the *Atoh7<sup>-/-</sup>*, and/or misguided axons.

211 Three representative areas of each retina were averaged for the density analysis

212 In E12.5 embryonic retinal sections, a representative confocal image was taken  
213 at 40x of 600  $\mu\text{m}$  x 600  $\mu\text{m}$  with optical sections of 1  $\mu\text{m}$  projected together with  
214 maximum intensity. The sections chosen for analysis were all positive for Pax2+ optic  
215 nerve head cells, as the central retina contains the earliest-born RGCs. At least two  
216 sections with matching criteria were analyzed for each E12.5 embryo. Density was  
217 calculated by dividing the number of Brn3a+ RGCs and dividing by the area of the  
218 retina. To limit the analysis to the RGC neurogenic zone, we limited the quantification to  
219 the leading edge of RGC genesis. The percentage of mature Brn3a+ RGCs at E12.5  
220 were determined by counting their number within the ganglion cell layer (GCL). The  
221 number of mature Brn3a+ RGCs was then divided by the number of total Brn3a+ RGCs  
222 in a section, and then averaged across all sections. This ratio represents the number of  
223 Brn3a+ RGCs already in the nascent ganglion cell layer versus RGCs migrating through  
224 the neuroblast layer to the ganglion cell layer.

225

### 226 **Multielectrode array recordings**

227 Mice were dark-adapted for 1-2 hours before being sacrificed and dissected under dim  
228 red light. Retinas were isolated in Ames' medium (Sigma) bubbled with 95% O<sub>2</sub>/5% CO<sub>2</sub>  
229 (carbogen) at room temperature, trimmed into small rectangles, and then placed on a  
230 6x10 perforated multielectrode array (Multichannel Systems, Tübingen, Germany),  
231 ganglion-cell-side down. Tissue was perfused with Ames' bubbled with carbogen and  
232 kept at 32°C throughout the experiment. Data acquisition was performed using the  
233 MC\_Rack software (ALA Scientific Instruments, Inc.), at a 50-kHz sampling rate. An  
234 offline spike sorter (Plexon Inc) was used for spike sorting.

235 UV stimuli ( $I_{\text{mean}} \approx 5 \times 10^3$  photons/cm<sup>2</sup>/s, 398 nm) were generated through a  
236 modified DLP projector (HP Notebook Projection Companion Projector, Model: HSTNN-  
237 FP01) (frame rate = 60 Hz) and were delivered through an inverted microscope  
238 objective. All stimuli were programmed using the *Psychophysics Toolbox* in Matlab (The  
239 Mathworks, Natick, MA). Stimuli include: (1) 120-s, 1-Hz full-field square-wave flash  
240 (100% Michelson contrast); (2) 10-min Gaussian white noise (GWN) flickering  
241 checkerboard (pixel size = 44.77  $\mu\text{m}$ ); (3) 10-min spatially correlated “cloud” stimulus  
242 that was generated by low-pass filtering the GWN. The cloud stimulus introduced dark  
243 and bright areas of a range of scales within each frame, with the purpose of driving  
244 large spatial receptive fields.

245 Analysis was first performed using custom-written Matlab (MATLAB R2014b)  
246 codes, the results later were exported and edited in Adobe Illustrator CS6. For each  
247 cell, the peristimulus time histogram (PSTH) of responses to square-wave flash was  
248 calculated using 10-ms bins. Spatial and temporal receptive fields were identified based  
249 on noise data using a nonlinear model previously described in detail (McFarland et al.,  
250 2013; Shi et al., 2019).

251 Fewer cells were recorded from *Atoh7<sup>Cre/Cre</sup>;Bax<sup>-/-</sup>* mice compared to the wildtype  
252 and *Bax<sup>-/-</sup>*, as the nerve fiber layer (NFL) and retinal vasculature are improperly  
253 developed and thus provide an insulating layer that needs to be removed in order to  
254 obtain high quality recordings. No cells were recorded from *Atoh7<sup>Cre/Cre</sup>* mice, due to the  
255 >99% reduction in RGC numbers.

256

### 257 **Pupillary light response (PLR)**

258 PLR experiments were performed on mice that were dark adapted for at least 1 hour  
259 prior to any experiment. PLR was measured by gently restraining the mice by hand  
260 (without anesthesia) and exposing them to a cool white light LED bulb (6500K, light  
261 intensity: 15 W/m<sup>2</sup>, MR16, SuperBrightLEDs.com) that was directed at one eye using a  
262 gooseneck arm of a dissecting microscope light source. Constriction of the pupil was  
263 recorded using a Sony Handycam camcorder (FDRAX33) from either the contralateral  
264 or ipsilateral eye to the light source. The baseline pupil size of each mouse was first  
265 recorded for at least 5 seconds using an infrared light source, following which the white



266 LED bulb was turned on for at least 30 seconds. Video recordings were analyzed by  
267 creating screen shot images in Joint Photographic Experts Group format (jpg) of the  
268 pupil prior to and during light stimulation using VLC media player  
269 (<https://www.videolan.org/vlc/>). Pupil area was then quantified in ImageJ (Fiji,  
270 RRID:SCR\_002285). To determine the relative pupil area, pupil size during the light  
271 stimulation was divided by pupil size prior to light stimulation.

272

### 273 **Tissue dissociation for generation of single-cell suspensions**

274 Eyes were enucleated from E14 time-pregnant animals and placed directly into ice-cold  
275 1X PBS. Retinas were dissected in cold 1X PBS, and then placed into 200  $\mu$ l of cold  
276 HBSS per 2-3 retinas. Tissue dissociation was induced through addition of an  
277 equivalent volume of Papain solution (1 ml - 700  $\mu$ l reagent grade water, 100  $\mu$ l fresh 50  
278 mM L-Cysteine (Sigma), 100  $\mu$ l 10 mM EDTA, 10  $\mu$ l 60 mM 2-mercaptoethanol (Sigma),  
279 with Papain added to 1 mg/ml (1:10 dilution of 10 mg/ml Papain solution; Worthington)).  
280 Papain-retina mixture was placed at 37°C for 10 minutes with slight trituration every 2-3  
281 minutes. Enzymatic dissociation was halted through addition of 600  $\mu$ l of Neurobasal  
282 Media + 10% FBS for every 400ul of dissociation solution. DNA from lysed cells was  
283 removed using 5  $\mu$ l RNase-free DNase I (Roche) for every 1 ml dissociate and  
284 incubated at 37°C for 5 minutes, followed by slight trituration using a 1 ml pipette. Cells  
285 were pelleted after centrifugation (300 RCF for 5 minutes at 4°C), followed by  
286 resuspension in 2-3 ml of Neurobasal media supplemented with 1% FBS. The final  
287 solution was passed through a 50  $\mu$ m filter to remove cellular aggregates and  
288 undissociated debris.

289

### 290 **10x Genomics Sequencing and Analysis**

291 Single cell RNA sequencing of dissociated retinal cells from E14 *Atoh7*<sup>-/+</sup>;*Bax*<sup>-/-</sup> and  
292 *Atoh7*<sup>-/-</sup>;*Bax*<sup>-/-</sup> was performed using 10x Genomics Chromium 3' v2 platform (PN-  
293 120223) (Pleasanton, CA), followed by sequencing using the NextSeq500 platform with  
294 default 10x sequencing parameters (R1 - 26bp; R2 - 98bp; i7 - 8bp). Single-cell analysis  
295 of the wildtype (WT) E14 developing mouse retina was obtained from previously

296 reported samples obtained from GEO (GSE118614); data obtained using similar  
297 isolation protocols are described previously (Clark et al., 2019).

298

### 299 **Gene Set Usage Pattern Discovery with scCoGAPS**

300 CoGAPS v.3.5.6 (Sherman et al., 2019; Stein-O'Brien et al., 2019) was used to find  
301 patterns of gene set usage by Neurogenic and Retinal Ganglion cells. The expression  
302 matrix used as input was normalized to 10,000 counts per cell, subsetted down to 5235  
303 most highly variable genes and log2 transformed. The CoGAPS parameters used are:  
304 singleCell=TRUE, nPatterns = 30, nIterations = 50000, distributed = single-cell,  
305 sparseOptimization = True, seed = 803L, and nSets = 10. The final number of patterns  
306 stabilized at 31.

307

### 308 **Identification of *Atoh7*-Dependent Genes**

309 Data was subsetted down to neurogenic RPCs and RGCs. Monocle's differential gene  
310 test was conducted between control (WT and *Bax*<sup>-/-</sup>) and *Atoh7* mutants (*Atoh7*<sup>-/-</sup> *Atoh7*<sup>-/-</sup>  
311 *;Bax*<sup>-/-</sup>) as such:

```
312 differentialGeneTest(dat[genes expressed in >=10 cells], fullModelFormulaStr =  
313 '~(Atoh7 genotype) + Total_mRNAs', reducedModelFormulaStr =  
314 '~Total_mRNAs',cores=4).
```

315

### 316 **Pseudotime Analysis between Genotypes**

317 Scanpy v1.4 (Wolf et al., 2018) was first used to assign diffusion pseudotime values  
318 (Haghverdi et al., 2016) to cells in the retinal ganglion cell trajectory. Cell types included  
319 in this final dataset were restricted to retinal ganglion cells, primary RPCs and  
320 neurogenic RPCs. To preprocess the dataset, genes <10 counts were removed, and the  
321 expression matrix was normalized to 10,000 counts/cell and log-transformed. Highly  
322 variable genes used for ordering were identified using Scanpy's `'highly_variable_genes'`  
323 function with default parameters except `flavor='cell_ranger'` and `n_top_genes=3000`. 50  
324 principal components were calculated using default PCA parameters with  
325 `random_state=123456`. To compute the neighborhood graph with the batch effect of  
326 genotype removed, we used BBKNN with `batch_key = "Genotype"` and



327 neighbors\_within batch=3 (Polański et al., 2019). 10 diffusion components were then  
328 computed and used for input to assign diffusion pseudotime values with an RPC cell as  
329 root. To find genes differentially expressed between the developmental trajectories of  
330 the WT and *Atoh7<sup>Cre/Cre</sup>;Bax<sup>-/-</sup>* genotypes, Monocle's differential gene test (Qiu et al.,  
331 2017; Trapnell et al., 2014) was performed in R, on neurogenic RPCs and RGCs of WT  
332 and *Atoh7<sup>Cre/Cre</sup>;Bax<sup>-/-</sup>* null genotypes:

```
333     differentialGeneTest(dat[genes expressed in >=10 cells], fullModelFormulaStr =  
334     '~sm.ns(Pseudotime,df=3)*Genotype+Total_mRNAs', reducedModelFormulaStr  
335     = '~sm.ns(Pseudotime,df=3)+Genotype+Total_mRNAs',cores=3)
```

336

### 337 **Data Availability**

338 Processed (expression, gene (featureData), and cell (phenoData) matrices) and raw  
339 sequence information (.bam files) are available for direct download through GEO  
340 GSE148814.

341

### 342 ***In situ* Hybridization**

343 Developing embryos harvested at E14.5 were washed in petri dishes filled with sterile  
344 DEPC-treated PBS at least three times. The head of the embryo was plunged into OCT  
345 and then immediately frozen and stored at -80°C until needed, and the tail was used for  
346 genotyping. 20 µm sections were taken using a cryostat. Sections were allowed to dry  
347 to slides for a few hours and then were stored at -80°C until needed. *In situ* hybridization  
348 was performed as previously described (Shimogori et al., 2010).

349

350

## 351 **Results**

352

### 353 ***Atoh7* promotes RGC survival, but RGC specification is largely *Atoh7*- 354 independent**

355 In the absence of *Atoh7*, there is an increase in apoptosis of both *Atoh7*-derived cells  
356 across embryonic retinal development and non-*Atoh7*-derived cells in the GCL at E16.5  
357 and E17.5 (Feng et al., 2010; Prasov and Glaser, 2012). These data suggest that *Atoh7*

358 may promote RGC survival in both a cell-autonomous and cell non-autonomous  
359 manner. To better understand the role *Atoh7* plays in RGC development, independent  
360 of its role in RGC survival, we disrupted both *Atoh7* and the proapoptotic *Bax* gene, in  
361 order to inhibit apoptosis in the retina.

362 We used *Atoh7<sup>Cre/Cre</sup>* mice, in which the *Atoh7* coding sequence is replaced with  
363 Cre recombinase via targeted recombination, generating a null allele, to analyze *Atoh7*  
364 function (Yang et al., 2003). We first examined the expression of RBPMS and *Isl1*, both  
365 of which are broadly expressed in RGCs, in *Atoh7<sup>Cre/Cre</sup>;Bax<sup>-/-</sup>* mice (Figure 1A-C)  
366 (hereafter referred to as *Atoh7<sup>-/-</sup>;Bax<sup>-/-</sup>* mice). *Isl1*, a LIM family homeodomain  
367 transcription factor, is necessary for RGC development and maintenance in adulthood  
368 (Mu et al., 2008; Pan et al., 2008), and is expressed in mature RGCs, bipolar, and  
369 amacrine cells. Using anti-Rbpms to selectively label all RGCs, we observed an  
370  $159\pm 7\%$  (Figure 1A,B) increase in RGC number in *Bax<sup>-/-</sup>* retinas, in line with previous  
371 results indicating that RGCs undergo extensive levels of apoptosis during development.  
372 However, we observe only a  $25.2\pm 0.9\%$  reduction in RGCs in *Atoh7<sup>-/-</sup>;Bax<sup>-/-</sup>* relative to  
373 *Bax<sup>-/-</sup>* retinas. This contrasts with the  $99.54\pm 0.12\%$  reduction in RGCs in the *Atoh7<sup>-/-</sup>*  
374 compared to controls (Figure 1A,B). Similar results were observed for anti-*Isl1* cells in  
375 the GCL (Figure 1A,C).

376 Specific RGC markers, *Brn3a* (*Pou4f1*) and *Brn3b* (*Pou4f2*), were used to  
377 quantify RGCs. For wildtype and *Bax<sup>-/-</sup>* lines, *Brn3a* and *Brn3b* numbers were similar to  
378 published reports (Figure 1D-F) (Prasov and Glaser, 2012; Rodriguez et al., 2014;  
379 Wang et al., 2001; Xiang et al., 1995). In the *Atoh7<sup>-/-</sup>* line a  $99.72\pm 0.17\%$  reduction in  
380 *Brn3a* RGC density was observed. However, in *Atoh7<sup>-/-</sup>;Bax<sup>-/-</sup>* mice, the *Brn3a* RGCs  
381 were substantially rescued in the *Atoh7<sup>-/-</sup>* background and remained into adulthood.  
382  $74.7\pm 0.9\%$  of *Brn3a* RGCs are rescued in *Atoh7<sup>-/-</sup>;Bax<sup>-/-</sup>* mice relative to *Bax<sup>-/-</sup>* levels in  
383 adult, and RGCs display normal distribution across the entire retina (Figure 1D,E,  
384 Supplemental Figure 1A,A'). Interestingly, *Brn3b* RGCs were also increased in *Atoh7<sup>-/-</sup>*  
385 *;Bax<sup>-/-</sup>* relative to *Bax<sup>-/-</sup>* retinas, but to a lesser extent than the *Brn3a* ( $28.8\pm 5.9\%$ ; Figure  
386 1D,F, Supplemental Figure 1B,B'). Expression of *Isl1*, *Brn3b*, and, to a lesser extent  
387 *Brn3a* have previously reported to require *Atoh7* (Mu et al., 2008, 2004, 2005; Pan et  
388 al., 2008; Rodriguez et al., 2014; Wu et al., 2015). However, our data indicates that the

389 expression of *Isl1*, *Brn3a*, and *Brn3b* expression in RGCs can occur independent of  
390 *Atoh7* (Figure 1).

391 To investigate the extent to which rescued RGCs resembled wildtype neurons,  
392 we examined the expression of markers of major classes of mature RGCs. We  
393 investigated the prevalence of intrinsically photosensitive RGCs (ipRGCs) within *Atoh7*<sup>-/-</sup>  
394 *;Bax*<sup>-/-</sup> retinas. During the development of ipRGCs, a majority of cells express *Brn3b*,  
395 although in some cases only transiently (Chen and Hattar, 2012). To determine the  
396 percentage of rescued ipRGCs in *Atoh7*<sup>-/-</sup>*;Bax*<sup>-/-</sup> mice, we used a melanopsin antibody  
397 that predominantly labels the high melanopsin-expressing M1 and M2 ipRGC  
398 populations. We observe that 34.1% of ipRGCs are rescued in *Atoh7*<sup>-/-</sup>*;Bax*<sup>-/-</sup> mice  
399 relative to *Bax*<sup>-/-</sup>, proportions similar to the fraction of *Brn3b*-positive RGCs in wildtype  
400 (Figure 1D,F, Supplemental Figure 1C-F). This indicates that *Brn3b*-positive ipRGCs  
401 differentiate normally in the absence of *Atoh7*.

402 To eliminate the possibility that global loss of function of *Bax* caused a non-  
403 specific rescue of RGC development, we tested the effects of retina-specific conditional  
404 mutants of *Bax*. Using *Chx10-Cre;Atoh7*<sup>Cre/Cre</sup>*;Bax*<sup>fl/fl</sup> (Figure 1G,H). In this model, *Bax* is  
405 selectively disrupted in RPCs beginning at E10-10.5 (Rowan and Cepko, 2004).  
406 Removal of *Bax* from all RPCs shows RGC development to the same extent as in  
407 *Atoh7*<sup>Cre/Cre</sup>*;Bax*<sup>-/-</sup> (Figure 1G, H). In contrast, *Atoh7*<sup>Cre/Cre</sup>*;Bax*<sup>fl/fl</sup> mice did not show any  
408 detectable rescue of RGC development (Figure 1G,H). This suggests that the survival-  
409 promoting effects of *Atoh7* may take place only during a narrow temporal window, and  
410 that Cre-mediated deletion of *Bax* in the *Atoh7*<sup>Cre/Cre</sup> line may not occur rapidly or  
411 efficiently enough to rescue RGC development.

412 In both wildtype and *Atoh7*<sup>-/-</sup>*;Bax*<sup>-/-</sup> animals, 34±11% and 34±26% of RGCs are  
413 derived from *Atoh7*-expressing cells, a finding which independently confirms similar  
414 lineage tracings in previous studies (Supplemental Figure 2A-C) (Brzezinski et al.,  
415 2012; Feng et al., 2010). This indicates that while RGCs that are normally derived from  
416 *Atoh7*-expressing neurogenic RPCs are reduced in the absence of *Atoh7*, *Atoh7* is not  
417 required for their specification. Furthermore, RGCs that are derived from non-*Atoh7*-  
418 expressing RPCs require *Atoh7* for survival through a non-cell autonomous mechanism.

419

420 **RGCs specified in the absence of *Atoh7* generate light-driven photic responses**  
421 **transduced from the outer retina**

422 As we determined that loss of Bax in the *Atoh7*<sup>-/-</sup> background rescues RGC  
423 specification, we next sought to investigate the degree to which RGCs differentiated in  
424 the absence of *Atoh7*. One hallmark of RGC differentiation is formation of presynaptic  
425 contacts and the generation of light-induced action potentials. We used multi-electrode  
426 array recordings to test the light responsiveness of the RGCs within the various mutant  
427 models. Spatiotemporal noise stimuli were used to activate the retina with a mean  
428 excitation of 398 nm ( $I_{\text{mean}} \approx 5 \times 10^3$  photons/cm<sup>2</sup>/s), a wavelength that predominantly  
429 activates S-cones (Wang et al., 2011), and does not activate Opn4-expressing ipRGCs  
430 (Berson et al., 2002; Do, 2019; Do and Yau, 2010; Hattar et al., 2002). We observed an  
431 identical stimulus-response profile in wildtype and *Bax*<sup>-/-</sup> RGCs (Figure 2A): an expected  
432 result given that *Bax*<sup>-/-</sup> mice display normal visual responses within the Morris water  
433 maze test (Chen et al., 2013). The population of RGCs included cells with similar light-  
434 evoked responses as ON sustained, ON transient, ON/OFF transient, OFF transient, or  
435 OFF sustained RGCs (Figure 2A, Supplemental Figure 3). The spatial receptive fields of  
436 the *Atoh7*<sup>-/-</sup>;*Bax*<sup>-/-</sup> RGCs were also slightly smaller than normal (*Atoh7*<sup>-/-</sup>;*Bax*<sup>-/-</sup>  
437 average 191±37.1 μm [n=56 from 8 mice], control average 212±42.3 μm [n=92 from 5  
438 mice] and *Bax*<sup>-/-</sup> average 223±42.4 μm [n=96 from 4 mice]) (Figure 2B) and the kinetics  
439 of the light-driven responses in the *Atoh7*<sup>-/-</sup>;*Bax*<sup>-/-</sup> retinas slightly slower than those of  
440 control and *Bax*<sup>-/-</sup> cells (Figure 2C).

441 The linear analysis used for the MEA data can only reveal an averaged STA,  
442 which could be a compression of multiple receptive fields. Thus those having multiple  
443 receptive fields such as ON-OFF cells could potentially be hidden with this method and  
444 require more sophisticated analysis strategy (Shi et al., 2019). However, diversity in  
445 PSTH profiles is clearly observed, suggesting that different cell types coexist in *Atoh7*<sup>-/-</sup>  
446 *Bax*<sup>-/-</sup> mice. We chose not to perform more complex analysis such as classifying each  
447 cell into known cell types due to the relatively small sample size. These will be intriguing  
448 questions to address when larger amounts of data are made accessible. The near-  
449 normal properties of the *Atoh7*<sup>-/-</sup>;*Bax*<sup>-/-</sup> RGCs show that RGCs present in the *Atoh7*<sup>-/-</sup>

450  $^{-/-};Bax^{-/-}$  are wired properly to the outer retina, specifically the S-cones, and receive  
451 normal circuit input.

452

### 453 **RGC axon guidance is *Atoh7*-dependent**

454 While RGCs in *Atoh7* $^{-/-};Bax^{-/-}$  animals appropriately respond to detection of visual stimuli  
455 by the outer retina, the ability of these RGCs to form postsynaptic connections in the  
456 brain is compromised. We observed a substantially reduced pupillary light response in  
457 *Atoh7* $^{-/-};Bax^{-/-}$  animals compared to controls (Figure 3B,C). To determine the cause of  
458 behavioral deficits, we assessed the distribution of RGC axons. Immunostaining for  
459 Smi32 (non-phosphorylated Nfh) (Figure 3A,D, Supplemental Figure 4C), Nfh, and Nfm  
460 (Supplemental Figure 4A,B) was used to evaluate RGC axonal integrity, and showed  
461 normal architecture in wildtype and *Bax* $^{-/-}$  mice. We were surprised to find that the <1%  
462 of RGCs that survive in the *Atoh7* $^{-/-}$  showed severe guidance defects, in that they  
463 fasciculate, come in close proximity to where the optic disc should be, seem to  
464 overshoot the optic disc, and then continue to extend within the retina. The great  
465 majority of *Atoh7* $^{-/-}$  RGC axons fail to correctly target the optic disc, with only a few  
466 axons exiting and forming a rudimentary optic nerve, leading to a severely reduced PLR  
467 (Figure 3B,C, Supplemental Figure 5A-C). The gross misguidance of axons was also  
468 observed in *Atoh7* $^{-/-};Bax^{-/-}$  mice (Figure 3A,D). As in *Atoh7* $^{-/-}$  mice, RGC axons in *Atoh7* $^{-/-};Bax^{-/-}$   
469 mice fasciculate, fail to correctly target the optic disk, and form tracts that extend  
470 around the retina, with only rudimentary optic nerves observed. This guidance defect  
471 did not result from defective formation of the optic disc, as Pax2-positive glial cells that  
472 mark this structure are present in the *Atoh7* $^{-/-};Bax^{-/-}$  at E12.5 (Supplemental Figure 6A,B)  
473 and E14.5 (data not shown). This demonstrates that the optic disk is present, but the  
474 axons are unable to find their way out of the retina in large numbers. These findings are  
475 reminiscent of previous reports in zebrafish, in which morpholino-mediated disruption of  
476 *atoh7* expression in early-stage RPCs disrupted the correct targeting of axons of later-  
477 born, *atoh7*-positive RGCs to the optic tectum (Pittman et al., 2008).

478 Previous studies have observed a lack or massive reduction in physical or  
479 functional connection to the brain in *Atoh7* $^{-/-}$  mice (Brown et al., 2001; Brzezinski et al.,  
480 2005; Triplett et al., 2011; Wee et al., 2002). Consistent with the failure of mutant RGCs

481 to correctly target the optic nerve, we observe severe disruptions in behavioral  
482 responses to light in *Atoh7*<sup>-/-</sup>;*Bax*<sup>-/-</sup> mice that are essentially indistinguishable from those  
483 seen in *Atoh7*<sup>-/-</sup> mice. *Atoh7*<sup>-/-</sup>;*Bax*<sup>-/-</sup> mice show no detectable optokinetic response  
484 (Supplemental Figure 7A), and show no visual cue-dependent reduction in escape time  
485 during successive trials of the Morris water maze (Supplemental Figure 7B). *Opn4:Tau-*  
486 *lacZ* knock-in mice, which visualize the axonal projections of M1 ipRGCs, show no  
487 detectable signal in the brain (Supplemental Figure 7C) (Hattar et al., 2002). Intraocular  
488 injection of fluorescently-labeled cholera toxin beta, which visualizes RGC axonal  
489 terminals (Bedont et al., 2014), likewise shows no brain labeling in both *Atoh7*<sup>-/-</sup>;*Bax*<sup>-/-</sup>  
490 and *Atoh7*<sup>-/-</sup> mice (Supplemental Figure 7D). However, while the contralateral PLR is  
491 significantly reduced compared to wildtype in both the *Atoh7*<sup>-/-</sup> and *Atoh7*<sup>-/-</sup>;*Bax*<sup>-/-</sup> mice, it  
492 is nonetheless detectable, indicating that a small number of RGC axons target the  
493 olivary pretectal nucleus in *Atoh7*<sup>-/-</sup>;*Bax*<sup>-/-</sup> mice, although we are unable to detect these  
494 using standard techniques (Figure 3B,C, Supplemental Figure 5 A-C).

495

#### 496 **Retinal vasculature development is disrupted in the absence of *Atoh7***

497 In both mice and humans, loss of *Atoh7* expression results in persistence of the hyaloid  
498 vasculature (Edwards et al., 2012; Ghiasvand et al., 2011; Kondo et al., 2016; Prasov et  
499 al., 2012). The persistence of the hyaloid vasculature in *Atoh7*<sup>-/-</sup> retinas until P14 was  
500 previously observed. We likewise observe persistence of the hyaloid vasculature into  
501 adulthood in *Atoh7*<sup>-/-</sup> retinas (Figure 3E), which is observed even in one year old mice  
502 (data not shown). Surprisingly, even with the rescue of a majority of Brn3a RGCs in  
503 *Atoh7*<sup>-/-</sup>;*Bax*<sup>-/-</sup> animals, the hyaloid vasculature still fails to regress (Figure 3E). Likewise,  
504 *Crx>Atoh7*;*Atoh7*<sup>-/-</sup> mice, in which *Atoh7* is misexpressed in photoreceptor precursors,  
505 also fail to induce hyaloid regression (Figure 3E). This is in sharp contrast to the  
506 rescued vascular phenotype observed in *Atoh7*<sup>tTA/tTA</sup>;*B&I-EE* mice, when *Brn3b* & *Isl1*  
507 are ectopically expressed from the endogenous *Atoh7* locus in a *Atoh7*-deficient mouse  
508 using the tet-off system (Wu et al., 2015)(Figure 3E), and implies that *Brn3b* and *Isl1*  
509 may activate expression of secreted factors that drive vascular regression.

510

511



## 512 **RGC differentiation is delayed in the absence of *Atoh7***

513 In order to examine potential differences in RGC development within *Atoh7*<sup>-/-</sup> and *Atoh7*<sup>-/-</sup>;  
514 *Bax*<sup>-/-</sup> compared to wildtype and *Bax*<sup>-/-</sup> control animals, we next performed single-cell  
515 RNA-sequencing on *Bax*<sup>-/-</sup>, *Atoh7*<sup>-/-</sup>, and *Atoh7*<sup>-/-</sup>;*Bax*<sup>-/-</sup> retinas to more comprehensively  
516 profile changes in cell type specification and global transcriptional differences across  
517 the genotypes. We profiled 67,050 E14.5 retinal cells from *Bax*<sup>-/-</sup>, *Atoh7*<sup>-/-</sup>, and *Atoh7*<sup>-/-</sup>;  
518 *Bax*<sup>-/-</sup> mice, and aggregated the datasets with 26,078 age-matched wildtype retinal  
519 cells from previous studies (Clark et al., 2019) (Figure 4A,B, Supplemental Figure 8).  
520 Consistent with the previous single-cell studies of E14 mouse retinal development  
521 (Clark et al., 2019; Giudice et al., 2019), we observed a continuous manifold of cells,  
522 from primary RPCs to neurogenic RPCs, leading to three separate differentiation  
523 trajectories that give rise to RGCs, cones, and amacrine/horizontal cells, respectively  
524 (Figure 4A-B; Supplemental Figure 9A). Analysis of the cell type proportions across the  
525 genotypes revealed a depletion of RGCs in both *Atoh7* mutant samples (*Atoh7*<sup>-/-</sup> and  
526 *Atoh7*<sup>-/-</sup>;*Bax*<sup>-/-</sup>) compared to both wildtype and *Bax*<sup>-/-</sup> controls (Figure 4C-D,  
527 Supplemental Figure 8E-F). This reduction in the number of RGCs included a  
528 compensatory increase in cone photoreceptors and neurogenic RPCs, consistent  
529 previous findings (Figure 4C-D, Supplemental Figure 8E-F) (Brown et al., 2001;  
530 Brzezinski et al., 2005; Hufnagel et al., 2010; Wang et al., 2001).

531 Using the scRNA-seq data, we next assessed the differential gene expression  
532 within neurogenic RPCs and RGCs across control -- WT and *Bax*<sup>-/-</sup> -- and *Atoh7*-  
533 deficient -- *Atoh7*<sup>-/-</sup> and *Atoh7*<sup>-/-</sup>;*Bax*<sup>-/-</sup> -- samples. Using strict differential expression  
534 cutoffs (q-value < 1e-300), we identified 230 *Atoh7*-dependent differentially expressed  
535 transcripts within neurogenic RPCs and RGCs (Supplemental Table 1). Genes enriched  
536 within control samples (Figure 4E) highlighted many known factors in the specification  
537 and differentiation of RGCs, including *Pou4f2* (*Brn3b*), *Isl1*, *Pou6f2* (*Rpf-1*), *Elavl4*,  
538 *Gap43*, and *Irx2* (Choy et al., 2010; Ekström and Johansson, 2003; Kruger et al., 1998;  
539 Zhou et al., 1996) (Supplemental Figure 9B). Conversely, differentially expressed  
540 transcripts enriched in the *Atoh7* knockout samples (Figure 4E) were enriched for genes  
541 involved in the Notch-signaling pathway -- *Rbpj*, *Dll3*, *Notch1*, and *Hes6* -- and for  
542 transcripts enriched in neurogenic cells and photoreceptor precursors during retinal

543 development -- *Btg2*, *Neurog2*, *Bhlhe22*, *Insm1*, *Neurod1*, *Mybl1*, *Sstr2*,  
544 *3110035E14Rik* (Clark et al., 2019; Supplemental Figure 9B).

545 *Atoh7*-deficient RGCs also show dramatically reduced expression of genes  
546 known to regulate axon guidance including *Islr2*, which has been found to control RGC  
547 axon fasciculation, as well as axon guidance at the optic chiasm (Panza et al., 2015). Of  
548 particular interest are the observed increases in *Rbpj* and *3110035E14Rik* expressions  
549 in *Atoh7*<sup>-/-</sup> and *Atoh7*<sup>-/-</sup>;*Bax*<sup>-/-</sup> samples. *Rbpj* is an upstream regulator of *Atoh7*  
550 expression (Miesfeld et al., 2018b), and *3110035E14Rik* (*Vxn*), which functions similarly  
551 to *Atoh7* by promoting retinal neurogenesis and early retinal cell fate specification  
552 (Moore et al; 2018). The increased expression of transcripts that show enriched  
553 expression in neurogenic cells and photoreceptor precursors is consistent with the  
554 increase in generation of cone photoreceptor precursors seen in an *Atoh7*-deficient  
555 retina. Combined with a recovery in the specification of RGC numbers in adult *Atoh7*  
556 <sup>-/-</sup>;*Bax*<sup>-/-</sup> animals, these data suggest that loss of *Atoh7* expression leads to an increase  
557 in expression of genes specific to neurogenic RPCs at the expense of RGC-enriched  
558 transcripts, results consistent with a developmental delay.

559 In order to further assess the degree of an RGC-specific developmental delay we  
560 performed pseudotemporal analyses using Scanpy (Wolf et al., 2018)(Figure 4F). We  
561 observed a bias of the *Atoh7*-deficient cells within early pseudotime stages during RGC  
562 differentiation. Both wildtype and *Bax*<sup>-/-</sup> control cells had a broader distribution of cells  
563 across pseudotime, results consistent with a failure of maturation or developmental  
564 delay of RGC specification in *Atoh7*-deficient RGCs (Figure 4G). Differential expression  
565 analysis assessing the changes in gene expression across the interaction of  
566 pseudotime and genotypes revealed significant genotypic differences across RGC  
567 development (Figure 4H; Supplemental Table 2).

568 In both *Atoh7*<sup>-/-</sup> and *Atoh7*<sup>-/-</sup>;*Bax*<sup>-/-</sup> samples, we observed a reduction of  
569 expression in many genes enriched within mature RGCs -- *Pou4f2*, *Gap43*, *Sncg*, and  
570 *Isl1*. We likewise observed reduced expression of a subset of genes in neurogenic  
571 RPCs, including *Gal*. Increased expression of other genes predominantly expressed in  
572 neurogenic RPCs -- including *Neurod1*, *Insm1*, *Neurod4*, *Hes6*, *Onecut1*, *Onecut2*, and  
573 *Sox4* -- is observed in both *Atoh7*-deficient neurogenic RPCs and RGCs compared to



574 controls (Figure 4H). This implies that loss of function of *Atoh7* may delay differentiation  
575 of RGCs from neurogenic RPCs. These results overall, closely match those obtained  
576 from scRNA-Seq-based analysis of *Atoh7*<sup>-/-</sup> retina conducted at E13.5 (Wu et al., 2020).

577 We next performed *in situ* hybridization to examine changes in global transcript  
578 expression within the developing retina. RNA transcript expression was detected at  
579 E14.5, at which point most RGCs are specified (Sidman, 1960; Young, 1985), and we  
580 observed decreased expression of *Pou4f2* (*Brn3b*), *Isl1* and *Gal*, in both *Atoh7*<sup>-/-</sup> and  
581 *Atoh7*<sup>-/-</sup>;*Bax*<sup>-/-</sup> mice, as determined by chromogenic *in situ* hybridization (Figure 4I).  
582 Immunostaining of E14 retinas confirm a reduction in the number of cells  
583 immunopositive for Brn3a (*Pou4f1*) and Brn3b (*Pou4f2*) (Figure 4J), as well as the pan-  
584 RGC markers RBPMS and *Isl1* (Figure 4K), in the developing ganglion cell layer of  
585 *Atoh7*-deficient retinas. At E12.5 we observed a marked decrease in both overall RGC  
586 density and RGC number (Supplemental Figure 3). Together these results suggest that  
587 loss of function of *Atoh7* delays RGC differentiation, and leads to an accumulation of  
588 neurogenic RPCs.

589 To further identify patterns of temporal changes in gene expression across RGC  
590 genesis between *Atoh7* mutant and control retinas, we performed the non-negative  
591 matrix factorization technique scCoGAPS (Stein-O'Brien et al., 2019). Implementation of  
592 scCoGAPS parses the gene expression into groups ('patterns') based on gene  
593 expression profiles and without *a priori*, literature-based knowledge of gene interactions.  
594 Using 5235 highly variable genes across the 29,182 neurogenic RPCs and  
595 differentiating RGCs, we identified 31 patterns of gene expression (Supplemental Figure  
596 10). These patterns correlated with both neurogenic RPCs – Patterns 6, 25, 5, 24, 11,  
597 13, 18, 7, 21, 1, and 4 – and RGC – Patterns 8, 27, 28, 9, 26, 20, 22, 17, 31 – cell type  
598 annotations and highlighted temporal changes in gene expression as assessed through  
599 pseudotime analyses. Individual patterns - patterns 4, 5, and 29 - were highly correlated  
600 with neurogenic cell annotations and *Atoh7*<sup>-/-</sup> and *Atoh7*<sup>-/-</sup>;*Bax*<sup>-/-</sup> genotypes, consistent  
601 with a temporal delay in RGC specification, increased number of neurogenic cells, or  
602 failure of cell type specification of neurogenic RPCs as a consequence of lost *Atoh7*  
603 expression. Genes driving pattern 5 include genes enriched in early-stage neurogenic  
604 RPCs, *Gadd45a* and *Sox11* (Clark et al., 2019).

605           Conversely, patterns highly correlated with RGC cell type annotations and  
606 pseudotime – Patterns 9, 26, and 28 – had high correlation with control samples. The  
607 most highly weighted genes in Patterns 9 and 26 are *Gap43* and *Igfbp1*, respectively,  
608 which have been implicated in RGC axonal growth (Guo et al., 2018; Zhang et al.,  
609 2000). Pattern 28 highlights cells towards the end of the RGC trajectory and is largely  
610 driven by *Sncg*; a transcript enriched in most RGCs in the adult mouse retina (Soto et  
611 al., 2008). The association of neurogenic patterns with *Atoh7*<sup>-/-</sup> mutant retinas versus  
612 those that highlight RGC differentiation and maturation patterns with control retinas  
613 further support a developmental delay in mutant RGCs. Analysis of pattern marker  
614 expression across the genotypes (Supplemental Figure 10) highlights both the temporal  
615 delay and global changes in gene expression across the *Atoh7*<sup>-/-</sup> mutant retinas  
616 compared to controls.

617           Recent studies have comprehensively profiled RGC subtype diversity in the  
618 mouse retina (Rheaume et al., 2018; Tran et al., 2019). However, these studies did not  
619 characterize either the birthdates of individual RGC subtypes, or the transcriptional  
620 networks controlling RGC subtype specification. Our combined data supports evidence  
621 of both *Atoh7*-dependent and independent populations of RGCs. The delay in RGC  
622 maturation and the failure of optic nerve formation seen in *Atoh7*-deficient retinas  
623 suggest that the earliest pathfinding RGCs are *Atoh7*-dependent. We examined  
624 expression of markers of mature RGC subtypes (Tran et al., 2019) within the developing  
625 retina and correlated expression of the transcripts with RGC pseudotime (Supplemental  
626 Figure 11) as many of the mature RGC subtype markers are not specific to RGCs. We  
627 detected expression of selective markers for a fraction of mature RGC subtypes within  
628 the E14.5 scRNA-seq dataset. Of transcripts in which readily detectable expression was  
629 observed, many – including *Igfbp4*, *Foxp1*, *Stxbp6*, *Bhlhe22*, *Penk* – also display  
630 enriched expression in primary or neurogenic RPCs. Expression of some markers of  
631 RGC development and maturation – *Ebf3*, *Pou4f1*, *Pou4f2*, *Prdm8* and *Slc17a6* –  
632 correlated well with pseudotemporal ordering and were depleted in *Atoh7*-deficient  
633 RGCs. However, a limited number of RGC subtype markers, including *Irx3*, *Calb2*, and  
634 *Tac1* were largely absent from *Atoh7* mutant RGCs.

635 Our data suggest the existence of *Atoh7*-dependent factors that promote both  
636 RGC survival and pathfinding, and also drive hyaloid vascular regression. These are  
637 likely derived from *Atoh7*-expressing neurogenic RPCs and/or RGCs. Factors mediating  
638 hyaloid regression are likely to be secreted, while those regulating RGC survival could  
639 also potentially act through contact-mediated signaling. Few annotated secreted  
640 proteins show clear *Atoh7*-dependent expression in our scRNA-Seq dataset. The  
641 neuropeptide galanin (*Gal*), which is strongly expressed in both neurogenic RPCs and  
642 RGCs, was by far the most differentially expressed secreted factor in *Atoh7*-deficient  
643 mice (Figure 4E,I, Supplemental Table 1). Galanin has been implicated in promoting the  
644 survival of neural precursors (Cordero-Llana et al., 2014; Holmes et al., 2000), however,  
645 *Gal*-deficient animals showed no differences in either the hyaloid vasculature regression  
646 or RGC density, as compared to the control animals (Supplemental Figure 12).

647

648

## 649 Discussion

650 It is broadly accepted that *Atoh7* acts in RPCs as a competence factor that is essential  
651 for RGC specification (Brzezinski et al., 2012; Mu et al., 2005; Yang et al., 2003; Baker  
652 and Brown, 2018). In this study, though, we show that specification of the great majority  
653 of RGCs occurs normally even in the absence of *Atoh7*. While RGC specification can  
654 occur independent of *Atoh7*, *Atoh7* function is required to maintain RGC survival and  
655 proper targeting of RGC axons to the optic nerve head. Following disruption of both  
656 *Atoh7* and *Bax*, we observe only a 20% reduction in the number of RGCs relative to  
657 *Bax*-deficient controls. This compares to a greater than 95% reduction in RGC numbers  
658 in *Atoh7* mutants relative to wildtype controls. Although RGCs in *Atoh7*<sup>-/-</sup>;*Bax*<sup>-/-</sup> retinas  
659 show severe defects in targeting the optic nerve head, they respond robustly to  
660 photoreceptor stimulation. The presence of specified RGCs in the absence of *Atoh7*  
661 helps explain long-standing, puzzling observations: 1) 45% of RGCs are not derived  
662 from *Atoh7*-expressing progenitors; 2) molecular markers of RGCs are observed at  
663 considerably higher levels during early stages of retinal development than in adults in  
664 *Atoh7*-deficient retinas; and 3) the marked increase in apoptosis in the ganglion cell  
665 layer that occurs in the absence of *Atoh7* (Brzezinski et al., 2012; Feng et al., 2010;

666 Prasov and Glaser, 2012). Previous studies have implicated *Atoh7* as a direct upstream  
667 regulator of the essential RGC transcription factors *Brn3a*, *Brn3b*, and *Isl1*. Supporting  
668 this, an *Atoh7* hierarchy of RGC determinants, studies in which *Brn3b* and *Isl1* were  
669 inserted in place of the *Atoh7* coding sequence observed a complete rescue of normal  
670 RGC development (Wu et al., 2015). Our studies, however, indicate that when  
671 apoptosis is inhibited, *Brn3a*, *Brn3b*, *Isl1*, and *Rbpms* expression is induced at near  
672 normal levels within RGCs in both E14 and adult retinas, regardless of *Atoh7*  
673 expression. Therefore, we posit that factor(s) in addition to *Atoh7* activate expression of  
674 these genes.

675         The molecular mechanisms by which *Atoh7* controls axonal guidance and cell  
676 survival remain unclear. One hypothesis is that RGC axonal guidance and cell survival  
677 are linked and that loss of *Atoh7* expression fails to initiate expression of target-derived  
678 trophic cues. Because other studies have failed to detect substantial numbers of RGCs  
679 in *Atoh7*<sup>-/-</sup> mice at P0 (Brown et al., 2001; Feng et al., 2010; Prasov and Glaser, 2012;  
680 Wang et al., 2001) and target derived neurotrophic factors regulate apoptosis of RGCs  
681 between P0 and P12, we feel that *Atoh7*-induced cell survival is functioning at earlier  
682 time points than target-derived trophic signals. Additionally, as we did not observe RGC  
683 rescue within *Atoh7*<sup>Cre/Cre</sup>;*Bax*<sup>fl/fl</sup> mice, we suggest that immature RGCs rapidly  
684 degenerate as the result of the lack of an *Atoh7*-dependent survival factor. This wave of  
685 developmental apoptosis has been observed previously, but the underlying molecular  
686 mechanisms are unknown (Farah and Easter, 2005; Frade et al., 1997; Ogilvie et al.,  
687 1998; Péquignot et al., 2003; Rodríguez-Gallardo et al., 2005; Strom and Williams,  
688 1998; Valenciano et al., 2009). We hypothesize that this unknown factor or factors must  
689 be produced by either *Atoh7*-expressing neurogenic RPCs or RGCs derived from these  
690 cells.

691         Our data also reveal a marked delay in formation of RGCs from neurogenic  
692 RPCs in the absence of *Atoh7*. This is consistent with results from others that in *Atoh7*<sup>-/-</sup>  
693 retina, RGC formation is delayed by at least a day (Le et al., 2006; Prasov and Glaser,  
694 2012). When *Atoh7*-dependent RGCs are rescued later in development, as seen in  
695 targeted mutants in which *Atoh7* is expressed from the endogenous *Crx* locus, the  
696 hyaloid vasculature regression was not rescued, even though a modest rescue of RGC

697 formation is observed (Prasov and Glaser, 2012). In zebrafish retina, consistent with  
698 this result, loss of function of *atoh7* in early-stage RPCs disrupts correct targeting of  
699 axons in later-born RGCs to the optic nerve (Pittman et al., 2008).

700         Since *Atoh7* was previously thought to be a master transcriptional regulator of  
701 RGC specification, strategies aimed at targeted differentiation of RGCs for therapeutic  
702 purposes have focused on using forced expression of *Atoh7*. We, however, now  
703 appreciate RGC specification to be a far more complicated process. Although ectopic  
704 expression of *Atoh7* activates expression of RGC-specific genes in cultured retinal  
705 progenitor cells (Yao et al., 2007), induced pluripotent stem cells (Chen et al., 2010),  
706 and Müller glia derived retinal stem cells (Song et al., 2015, 2014), it is nonetheless  
707 typically not sufficient to drive these cells to become RGCs. This study sheds light on  
708 why this may be the case.

709         These findings demonstrate that additional factors act in parallel to *Atoh7* to  
710 control RGC specification. While multiple other transcription factors have been reported  
711 to regulate RGC specification -- including *Neurod1*, *Sox4*, and *Onecut2* (Jiang et al.,  
712 2013; Mao et al., 2013; Sapkota et al., 2014) -- these factors are unable to individually  
713 activate expression of *Brn3b* and *Isl1*. In *Atoh7<sup>-/-</sup>;Bax<sup>-/-</sup>* RGCs, however, we observe  
714 substantially increased expression of each of these transcription factors (Figure 4E;  
715 Supplemental Figure 10), suggesting the possibility that these factors, among others,  
716 may compensate for the loss of *Atoh7*. The identity of the non-cell-autonomous cues by  
717 which *Atoh7* regulates RGC survival, axon guidance, and hyaloid vasculature  
718 regression remain unknown. Further identification of the mechanisms regulating the  
719 interplay of intrinsic and extrinsic signals on RGC specification, survival, and maturation  
720 will help guide the future design of therapies aimed at maintaining and/or replacing  
721 damaged/lost RGCs.

722  
723

724 **Acknowledgements:** We thank Xiuqian Mu and Fuguo Wu for providing  
725 *Atoh7<sup>tTA/tTA</sup>;B&I-EE* mice, Lin Gan for providing *Atoh7<sup>Cre</sup>* mice, Nadean Brown for  
726 technical advice, Haiping Hao and Hopkins Transcriptomics and Deep-Sequencing  
727 Core for assistance with scRNA-Seq, and Wendy Yap for comments on the manuscript.

728 This work was supported by NIH Grants R01EY020560 (SB), R00EY27844 (BSC),  
729 EY19497 (TG), GM076430 and EY027202 (SH & HZ), EY021372 (JHS), and F32  
730 EY022543 (TS), the intramural research fund at the National Institute of Mental Health  
731 (MH002964) (SH), and an unrestricted grant to the Department of Ophthalmology and  
732 Visual Sciences from Research to Prevent Blindness (BSC).



## 733 **Figure Legends**

734

735 **Figure 1.** *Atoh7*-independent development of RGCs. (A-C) We observed a  $25.2 \pm 0.9\%$   
736 and  $21 \pm 3\%$  reduction in RBPMS+ RGC density or Isl1+ ganglion cell layer (GCL) cells  
737 when comparing *Atoh7*<sup>-/-</sup>;*Bax*<sup>-/-</sup> to *Bax*<sup>-/-</sup> mice. (D,E,F,G,H) Brn3a and Brn3b positive  
738 RGC density are only moderately reduced when apoptosis is blocked in *Atoh7*<sup>-/-</sup>;*Bax*<sup>-/-</sup>  
739 mice. (G,H) Brn3a positive RGC numbers are rescued when apoptosis is blocked in all  
740 neural retinal progenitor cells, when *Bax*<sup>lox/lox</sup> is crossed to the *Chx10-Cre* transgene,  
741 which is expressed in all RPCs. However, when *Bax* is specifically removed in *Atoh7*-  
742 *Cre* knock-in mice, Brn3a RGCs are not rescued. Mean  $\pm$  95% confidence intervals.  
743 Statistical significance tested by one-way ANOVA with Tukey's post test for multiple  
744 comparisons \*\*\*\*  $p < 0.0001$ .

745

746 **Figure 2.** *Atoh7* is not required for normal retinal wiring and electrophysiological  
747 function. Cells from *Atoh7*<sup>+/-</sup>;*Bax*<sup>-/-</sup>, and *Atoh7*<sup>-/-</sup>;*Bax*<sup>-/-</sup> mice responded to light similarly  
748 as those from wild type. (A) Two different examples, corresponding to two different sets  
749 of RGCs, per genotype of peristimulus time histogram averaged from 120 repetition of  
750 1-Hz square wave flash: WT (upper panel), *Atoh7*<sup>+/-</sup>;*Bax*<sup>-/-</sup> (middle), and *Atoh7*<sup>-/-</sup>;*Bax*<sup>-/-</sup>  
751 (lower panel). (B) Distribution of the spatial receptive field measured using white noise  
752 flickering checkerboard: WT (upper, cell count = 92), *Atoh7*<sup>+/-</sup>;*Bax*<sup>-/-</sup> (middle, cell count =  
753 94), and *Atoh7*<sup>-/-</sup>;*Bax*<sup>-/-</sup> (lower, cell count = 56). (C) the peristimulus time histogram  
754 (PSTH) of responses to square-wave flash was calculated using 10-ms bins. Mice  
755 assayed at P30. one-way ANOVA, followed by Dunnett's test,  $p < 0.05$ , between *Atoh7*-  
756 <sup>-/-</sup>;*Bax*<sup>-/-</sup> and wildtype.

757

758 **Figure 3.** RGC axon guidance and retinal vasculature development requires *Atoh7*-  
759 dependent RGCs. (A,D) Smi-32 labels a subset of RGCs and their axons in an adult  
760 wildtype retina. In *Atoh7*<sup>-/-</sup> mice, the Smi-32 positive RGCs have axon guidance deficits.  
761 In *Atoh7*<sup>-/-</sup>;*Bax*<sup>-/-</sup> mice, RGCs have severe axon guidance deficits. Highlighted region (A  
762 - *Atoh7*<sup>-/-</sup>;*Bax*<sup>-/-</sup>) is magnified in (D). (B,C) Using the contralateral pupillary light response  
763 as a readout of retina to brain connection allows the appreciation that the severe axon

764 guidance deficits allow for some connection to the brain of the RGCs in the *Atoh7*<sup>-/-</sup> or  
765 *Atoh7*<sup>-/-</sup>;*Bax*<sup>-/-</sup> retinas. (E) It has been previously reported that the hyaloid vasculature  
766 fails to regress in *Atoh7*<sup>-/-</sup> mice, thought to be due to lack of RGCs, however when the  
767 RGC numbers are rescued, in *Atoh7*<sup>-/-</sup>;*Bax*<sup>-/-</sup> mice, the hyaloid vasculature fails to  
768 regress. However, *Atoh7* is not necessary for the hyaloid regression and retinal  
769 vasculature development, seen using *Atoh7*<sup>tTA/tTA</sup>;*B&I*<sup>EE</sup> mice, which was previously  
770 seen to rescue all of the *Atoh7* null phenotypes. When *Atoh7* is rescued using the  
771 *Crx*>*Atoh7* transgene on the *Atoh7* null background, the optic nerve and 12% of RGCs  
772 are rescued (Prasov and Glaser, 2012), but the hyaloid vasculature does not regress.

773  
774 **Figure 4.** Single-cell analysis of E14.5 mutant retinas and gene detection in E14  
775 retinas. (A,B) UMAP dimension reduction of aggregated E14.5 single cell dataset  
776 colored by (A) genotype and (B) annotated cell-type. (C) Proportions of cell types  
777 derived from each genotype. (D) Proportions of annotated cell types within each  
778 genotype. (E) Heatmap of differentially expressed transcripts across control and *Atoh7*  
779 knockout (*Atoh7*<sup>-/-</sup> or *Atoh7*<sup>-/-</sup>;*Bax*<sup>-/-</sup>) neurogenic and RGCs. (F) UMAP dimension  
780 reduction of cells colored by Scanpy pseudotime values. (G) Density of retinal ganglion  
781 cells along pseudotime by genotype. (H) Heatmap displaying differentially expressed  
782 transcripts across the interaction of pseudotime and genotype. Cells are ordered by  
783 pseudotime within each genotype. (I) Chromogenic *in situ* hybridization detecting RNA  
784 transcripts of genes from (H). Insert, depicted by a red dotted line, *Atoh7*<sup>-/-</sup>;*Bax*<sup>-/-</sup> mice in  
785 (H) show robust galanin signal in a region outside the retina, but minimal signal in the  
786 retina (J-K). Immunohistochemistry detecting (J) RGC-specific markers: BRN3A and  
787 BRN3B and (K) pan-RGC markers: ISL1 and RBPMS in E14 retina from each genotype.  
788 Scale bar, 50 μm. Abbreviations: RPCs, retinal progenitor cells; RGCs, retinal ganglion  
789 cells.

790  
791 **Figure 5.** scCoGAPs analysis of single-cell dataset and RGC population changes in  
792 E12.5 retinas show a developmental delay in *Atoh7*<sup>-/-</sup>;*Bax*<sup>-/-</sup> mutants. (A) Heatmap  
793 showing the correlation between scCoGAPS pattern and cellular features. (B) Heatmap  
794 of pattern weights within individual cells ordered by pseudotime. Pattern correlations



795 with both pseudotime and each genotype are displayed at the right. (C-E) UMAP  
796 embedding of single-cell dataset used for scCoGAPS and colored by (C) celltype or (D)  
797 genotype. (E) UMAP embedding of dataset and colored by pattern weights of  
798 scCOGAPS patterns 4, 17 and 9, displaying progressive pattern usage across RGC  
799 development.

## 800 **References**

- 801
- 802 Baker NE, Brown NL. 2018. All in the family: proneural bHLH genes and neuronal  
803 diversity. *Dev Camb Engl* 145:dev159426. doi:10.1242/dev.159426
- 804
- 805 Bedont JL, LeGates TA, Slat EA, Byerly MS, Wang H, Hu J, Rupp AC, Qian J, Wong  
806 GW, Herzog ED, Hattar S, Blackshaw S. 2014. Lhx1 controls terminal  
807 differentiation and circadian function of the suprachiasmatic nucleus. *Cell*  
808 *Reports* 7:609–22. doi:10.1016/j.celrep.2014.03.060
- 809
- 810 Berson DM, Dunn FA, Takao M. 2002. Phototransduction by Retinal Ganglion Cells  
811 That Set the Circadian Clock. *Science* 295:1070–1073.  
812 doi:10.1126/science.1067262
- 813
- 814 Brown NL, Patel S, Brzezinski J, Glaser T. 2001. Math5 is required for retinal ganglion  
815 cell and optic nerve formation. *Development (Cambridge, England)* 128:2497–  
816 2508.
- 817
- 818 Brzezinski JA, Brown NL, Tanikawa A, Bush RA, Sieving PA, Vitaterna MH, Takahashi  
819 JS, Glaser T. 2005. Loss of Circadian Photoentrainment and Abnormal Retinal  
820 Electrophysiology in Math5 Mutant Mice. *Investigative Ophthalmology Vis Sci*  
821 46:2540. doi:10.1167/iovs.04-1123
- 822
- 823 Brzezinski JA, Prasov L, Glaser T. 2012. Math5 defines the ganglion cell competence  
824 state in a subpopulation of retinal progenitor cells exiting the cell cycle. *Dev Biol*  
825 365:395–413. doi:10.1016/j.ydbio.2012.03.006
- 826
- 827 Chen M, Chen Q, Sun X, Shen W, Liu B, Zhong X, Leng Y, Li C, Zhang W, Chai F,  
828 Huang B, Gao Q, Xiang AP, Zhuo Y, Ge J. 2010. Generation of retinal ganglion-  
829 like cells from reprogrammed mouse fibroblasts. *Invest Ophth Vis Sci* 51:5970–8.  
830 doi:10.1167/iovs.09-4504
- 831
- 832 Chen S-K, Badea TC, Hattar S. 2012. Photoentrainment and pupillary light reflex are  
833 mediated by distinct populations of ipRGCs. *Nature* 476:92–5.  
834 doi:10.1038/nature10206
- 835
- 836 Chen S-K, Chew KS, McNeill DS, Keeley PW, Ecker JL, Mao BQ, Pahlberg J, Kim B,  
837 Lee SCS, Fox MA, Guido W, Wong KY, Sampath AP, Reese BE, Kuruvilla R,  
838 Hattar S. 2013. Apoptosis regulates ipRGC spacing necessary for rods and  
839 cones to drive circadian photoentrainment. *Neuron* 77:503–15.

- 840 doi:10.1016/j.neuron.2012.11.028  
841
- 842 Choy SW, Cheng CW, Lee ST, Li VWT, Hui MNY, Hui C-C, Liu D, Cheng SH. 2010. A  
843 cascade of *irx1a* and *irx2a* controls *shh* expression during retinogenesis. *Dev*  
844 *Dyn Official Publ Am Assoc Anatomists* 239:3204–14. doi:10.1002/dvdy.22462  
845
- 846 Clark BS, Stein-O'Brien GL, Shiau F, Cannon GH, Davis-Marcisak E, Sherman T,  
847 Santiago CP, Hoang TV, Rajaii F, James-Esposito RE, Gronostajski RM, Fertig  
848 EJ, Goff LA, Blackshaw S. 2019. Single-Cell RNA-Seq Analysis of Retinal  
849 Development Identifies NFI Factors as Regulating Mitotic Exit and Late-Born Cell  
850 Specification. *Neuron* 102:1111-1126.e5. doi:10.1016/j.neuron.2019.04.010  
851
- 852 Cordero-Llana O, Rinaldi F, Brennan PA, Wynick D, Caldwell MA. 2014. Galanin  
853 promotes neuronal differentiation from neural progenitor cells in vitro and  
854 contributes to the generation of new olfactory neurons in the adult mouse brain.  
855 *Exp Neurol* 256:93–104. doi:10.1016/j.expneurol.2014.04.001  
856
- 857 Do MTH. 2019. Melanopsin and the Intrinsically Photosensitive Retinal Ganglion Cells:  
858 Biophysics to Behavior. *Neuron* 104:205–226. doi:10.1016/j.neuron.2019.07.016  
859
- 860 Do MTH, Yau K-W. 2010. Intrinsically photosensitive retinal ganglion cells. *Physiol Rev*  
861 90:1547–81. doi:10.1152/physrev.00013.2010  
862
- 863 Edwards MM, McLeod DS, Li R, Grebe R, Bhutto I, Mu X, Luttly GA. 2012. The deletion  
864 of *Math5* disrupts retinal blood vessel and glial development in mice. *Exp Eye*  
865 *Res* 96:147–156. doi:10.1016/j.exer.2011.12.005  
866
- 867 Ekström P, Johansson K. 2003. Differentiation of ganglion cells and amacrine cells in  
868 the rat retina: correlation with expression of HuC/D and GAP-43 proteins. *Dev*  
869 *Brain Res* 145:1–8. doi:10.1016/s0165-3806(03)00170-6  
870
- 871 Feng L, Xie Z, Ding Q, Xie X, Libby RT, Gan L. 2010. MATH5 controls the acquisition of  
872 multiple retinal cell fates. *Mol Brain* 3:36. doi:10.1186/1756-6606-3-36  
873
- 874 Gan L, Wang SW, Huang Z, Klein WH. 1999. POU Domain Factor *Brn-3b* Is Essential  
875 for Retinal Ganglion Cell Differentiation and Survival but Not for Initial Cell Fate  
876 Specification. *Dev Biol* 210:469–480. doi:10.1006/dbio.1999.9280  
877
- 878 Ghiasvand NM, Rudolph DD, Mashayekhi M, Brzezinski JA, Goldman D, Glaser T.  
879 2011. Deletion of a remote enhancer near *ATOH7* disrupts retinal neurogenesis,

- 880 causing NCRNA disease. *Nat Neurosci* 14:578–86. doi:10.1038/nn.2798  
881
- 882 Guo C, Cho K-S, Li Y, Tchedre K, Antolik C, Ma J, Chew J, Utheim TP, Huang XA, Yu  
883 H, Malik MTA, Anzak N, Chen DF. 2018. IGF1 Regulates Axon Growth  
884 through IGF-1-mediated Signaling Cascades. *Sci Rep-uk* 8:2054.  
885 doi:10.1038/s41598-018-20463-5  
886
- 887 Hattar S, Liao H-W, Takao M, Berson DM, Yau K-W. 2002. Melanopsin-Containing  
888 Retinal Ganglion Cells: Architecture, Projections, and Intrinsic Photosensitivity.  
889 *Science* 295:1065–1070. doi:10.1126/science.1069609  
890
- 891 Holmes FE, Mahoney S, King VR, Bacon A, Kerr NCH, Pachnis V, Curtis R, Priestley  
892 JV, Wynick D. 2000. Targeted disruption of the galanin gene reduces the number  
893 of sensory neurons and their regenerative capacity. *Proc National Acad Sci*  
894 97:11563–11568. doi:10.1073/pnas.210221897  
895
- 896 Hufnagel RB, Le TT, Riesenberger AL, Brown NL. 2010. Neurog2 controls the leading  
897 edge of neurogenesis in the mammalian retina. *Dev Biol* 340:490–503.  
898 doi:10.1016/j.ydbio.2010.02.002  
899
- 900 Hufnagel RB, Riesenberger AN, Quinn M, Brzezinski JA, Glaser T, Brown NL. 2013.  
901 Heterochronic misexpression of *Ascl1* in the *Atoh7* retinal cell lineage blocks cell  
902 cycle exit. *Mol Cell Neurosci* 54:108–20. doi:10.1016/j.mcn.2013.02.004  
903
- 904 Jarman AP, Grell EH, Ackerman L, Jan LY, Jan YN. 1994. *atonal* is the proneural gene  
905 for *Drosophila* photoreceptors. *Nature* 369:398–400. doi:10.1038/369398a0  
906
- 907 Jiang Y, Ding Q, Xie X, Libby RT, Lefebvre V, Gan L. 2013. Transcription Factors SOX4  
908 and SOX11 Function Redundantly to Regulate the Development of Mouse  
909 Retinal Ganglion Cells. *J Biol Chem* 288:18429–18438.  
910 doi:10.1074/jbc.m113.478503  
911
- 912 Kanekar S, Perron M, Dorsky R, Harris WA, Jan LY, Jan YN, Vetter ML. 1997. *Xath5*  
913 Participates in a Network of bHLH Genes in the Developing *Xenopus* Retina.  
914 *Neuron* 19:981–994. doi:10.1016/s0896-6273(00)80391-8  
915
- 916 Kay JN, Finger-Baier KC, Roeser T, Staub W, Baier H. 2001. Retinal Ganglion Cell  
917 Genesis Requires *lakritz*, a Zebrafish *atonal* Homolog. *Neuron* 30:725–736.  
918 doi:10.1016/s0896-6273(01)00312-9  
919

- 920 Khan K, Logan CV, McKibbin M, Sheridan E, Elçioglu NH, Yenice O, Parry DA,  
921 Fernandez-Fuentes N, Abdelhamed ZIA, Al-Maskari A, Poulter JA, Mohamed  
922 MD, Carr IM, Morgan JE, Jafri H, Raashid Y, Taylor GR, Johnson CA, Inglehearn  
923 CF, Toomes C, Ali M. 2011. Next generation sequencing identifies mutations in  
924 Atonal homolog 7 (ATOH7) in families with global eye developmental defects.  
925 *Hum Mol Genet* 21:776–83. doi:10.1093/hmg/ddr509  
926
- 927 Khor CC, Ramdas WD, Vithana EN, Cornes BK, Sim X, Tay W-T, Saw S-M, Zheng Y,  
928 Lavanya R, Wu R, Wang JJ, Mitchell P, Uitterlinden AG, Rivadeneira F, Teo Y-Y,  
929 Chia K-S, Seielstad M, Hibberd M, Vingerling JR, Klaver CCW, Jansonius NM,  
930 Tai E-S, Wong T-Y, Duijn CM van, Aung T. 2011. Genome-wide association  
931 studies in Asians confirm the involvement of ATOH7 and TGFBR3, and further  
932 identify CARD10 as a novel locus influencing optic disc area. *Hum Mol Genet*  
933 20:1864–1872. doi:10.1093/hmg/ddr060  
934
- 935 Knudson CM, Tung KSK, Tourtellotte WG, Brown GAJ, Korsmeyer SJ. 1995. Bax-  
936 Deficient Mice with Lymphoid Hyperplasia and Male Germ Cell Death. *Science*  
937 270:96–99. doi:10.1126/science.270.5233.96  
938
- 939 Kondo H, Matsushita I, Tahira T, Uchio E, Kusaka S. 2016. Mutations in ATOH7 gene in  
940 patients with nonsyndromic congenital retinal nonattachment and familial  
941 exudative vitreoretinopathy. *Ophthalmic Genet* 37:462–464.  
942 doi:10.3109/13816810.2015.1120316  
943
- 944 Kruger K, Tam AS, Lu C, Sretavan DW. 1998. Retinal Ganglion Cell Axon Progression  
945 from the Optic Chiasm to Initiate Optic Tract Development Requires Cell  
946 Autonomous Function of GAP-43. *J Neurosci* 18:5692–5705.  
947 doi:10.1523/jneurosci.18-15-05692.1998  
948
- 949 Le TT, Wroblewski E, Patel S, Riesenberger AN, Brown NL. 2006. Math5 is required for  
950 both early retinal neuron differentiation and cell cycle progression. *Dev Biol*  
951 295:764–778. doi:10.1016/j.ydbio.2006.03.055  
952
- 953 Macgregor S, Hewitt AW, Hysi PG, Ruddle JB, Medland SE, Henders AK, Gordon SD,  
954 Andrew T, McEvoy B, Sanfilippo PG, Carbonaro F, Tah V, Li YJ, Bennett SL,  
955 Craig JE, Montgomery GW, Tran-Viet K-N, Brown NL, Spector TD, Martin NG,  
956 Young TL, Hammond CJ, Mackey DA. 2010. Genome-wide association identifies  
957 ATOH7 as a major gene determining human optic disc size. *Hum Mol Genet*  
958 19:2716–2724. doi:10.1093/hmg/ddq144  
959

- 960 Mao C-A, Cho J-H, Wang J, Gao Z, Pan P, Tsai W-W, Mu X, Frishman LJ, Klein WH.  
961 2013. Reprogramming amacrine and photoreceptor progenitors into retinal  
962 ganglion cells by replacing Neurod1 with Atoh7. *Development* 140:2849–2849.  
963 doi:10.1242/dev.099549  
964
- 965 Mao C-A, Wang SW, Pan P, Klein WH. 2008. Rewiring the retinal ganglion cell gene  
966 regulatory network: Neurod1 promotes retinal ganglion cell fate in the absence of  
967 Math5. *Development* 135:3379–3388. doi:10.1242/dev.024612  
968
- 969 McFarland JM, Cui Y, Butts DA. 2013. Inferring nonlinear neuronal computation based  
970 on physiologically plausible inputs. *Plos Comput Biol* 9:e1003143.  
971 doi:10.1371/journal.pcbi.1003143  
972
- 973 Miesfeld JB, Glaser T, Brown NL. 2018a. The dynamics of native Atoh7 protein  
974 expression during mouse retinal histogenesis, revealed with a new antibody.  
975 *Gene Expr Patterns Gep* 27:114–121. doi:10.1016/j.gep.2017.11.006  
976
- 977 Miesfeld, J., Moon, M., Riesenber, A., Contreras, A., Kovall, R., Brown, N. 2018b. Rbpj  
978 direct regulation of Atoh7 transcription in the embryonic mouse retina. *Scientific*  
979 *reports* 8(1), 10195. <https://dx.doi.org/10.1038/s41598-018-28420-y>  
980
- 981 Mombaerts P, Wang F, Dulac C, Chao SK, Nemes A, Mendelsohn M, Edmondson J,  
982 Axel R. 1996. Visualizing an Olfactory Sensory Map. *Cell* 87:675–686.  
983 doi:10.1016/s0092-8674(00)81387-2  
984
- 985 Mu X, Beremand PD, Zhao S, Pershad R, Sun H, Scarpa A, Liang S, Thomas TL, Klein  
986 WH. 2004. Discrete gene sets depend on POU domain transcription factor  
987 Brn3b/Brn-3.2/POU4f2 for their expression in the mouse embryonic retina.  
988 *Development* 131:1197–1210. doi:10.1242/dev.01010  
989
- 990 Mu X, Fu X, Beremand PD, Thomas TL, Klein WH. 2008. Gene-regulation logic in  
991 retinal ganglion cell development: Isl1 defines a critical branch distinct from but  
992 overlapping with Pou4f2. *Proc National Acad Sci* 105:6942–6947.  
993 doi:10.1073/pnas.0802627105  
994
- 995 Mu X, Fu X, Sun H, Beremand PD, Thomas TL, Klein WH. 2005. A gene network  
996 downstream of transcription factor Math5 regulates retinal progenitor cell  
997 competence and ganglion cell fate. *Dev Biol* 280:467–481.  
998 doi:10.1016/j.ydbio.2005.01.028  
999

- 1000 Ohnuma S, Hopper S, Wang KC, Philpott A, Harris WA. 2002. Co-ordinating retinal  
1001 histogenesis: early cell cycle exit enhances early cell fate determination in the  
1002 *Xenopus* retina. *Development (Cambridge, England)* 129:2435–2446.  
1003
- 1004 Pan L, Deng M, Xie X, Gan L. 2008. ISL1 and BRN3B co-regulate the differentiation of  
1005 murine retinal ganglion cells. *Development* 135:1981–1990.  
1006 doi:10.1242/dev.010751  
1007
- 1008 Panza P, Sitko AA, Maischein H-M, Koch I, Flötenmeyer M, Wright GJ, Mandai K,  
1009 Mason CA, Söllner C. 2015. The LRR receptor *Islr2* is required for retinal axon  
1010 routing at the vertebrate optic chiasm. *Neural Dev* 10:23. doi:10.1186/s13064-  
1011 015-0050-x  
1012
- 1013 Pittman AJ, Law M-Y, Chien C-B. 2008. Pathfinding in a large vertebrate axon tract:  
1014 isotypic interactions guide retinotectal axons at multiple choice points. *Dev Camb*  
1015 *Engl* 135:2865–71. doi:10.1242/dev.025049  
1016
- 1017 Poggi L, Vitorino M, Masai I, Harris WA. 2005. Influences on neural lineage and mode  
1018 of division in the zebrafish retina in vivo. *J Cell Biol* 171:991–999.  
1019 doi:10.1083/jcb.200509098  
1020
- 1021 Prasov L, Glaser T. 2012. Pushing the envelope of retinal ganglion cell genesis: Context  
1022 dependent function of *Math5 (Atoh7)*. *Dev Biol* 368:214–230.  
1023 doi:10.1016/j.ydbio.2012.05.005  
1024
- 1025 Prasov L, Masud T, Khaliq S, Mehdi SQ, Abid A, Oliver ER, Silva ED, Lewanda A,  
1026 Brodsky MC, Borchert M, Kelberman D, Sowden JC, Dattani MT, Glaser T. 2012.  
1027 *ATOH7* mutations cause autosomal recessive persistent hyperplasia of the  
1028 primary vitreous. *Hum Mol Genet* 21:3681–3694. doi:10.1093/hmg/dds197  
1029
- 1030 Qiu X, Hill A, Packer J, Lin D, Ma Y-A, Trapnell C. 2017. Single-cell mRNA  
1031 quantification and differential analysis with *Census*. *Nat Methods* 14:309–315.  
1032 doi:10.1038/nmeth.4150  
1033
- 1034 Rheaume BA, Jereen A, Bolisetty M, Sajid MS, Yang Y, Renna K, Sun L, Robson P,  
1035 Trakhtenberg EF. 2018. Single cell transcriptome profiling of retinal ganglion cells  
1036 identifies cellular subtypes. *Nat Commun* 9:2759. doi:10.1038/s41467-018-  
1037 05134-3  
1038
- 1039 Rodriguez AR, Müller LP de S, Brecha NC. 2014. The RNA binding protein RBPMS is a



- 1040 selective marker of ganglion cells in the mammalian retina: RBPMS identifies  
1041 retinal ganglion cells. *J Comp Neurol* 522:1411–1443. doi:10.1002/cne.23521  
1042
- 1043 Rowan S, Cepko CL. 2004. Genetic analysis of the homeodomain transcription factor  
1044 Chx10 in the retina using a novel multifunctional BAC transgenic mouse reporter.  
1045 *Dev Biol* 271:388–402. doi:10.1016/j.ydbio.2004.03.039  
1046
- 1047 Sapkota D, Chintala H, Wu F, Fliesler SJ, Hu Z, Mu X. 2014. Onecut1 and Onecut2  
1048 redundantly regulate early retinal cell fates during development. *P Natl Acad Sci*  
1049 *Usa* 111:E4086-95. doi:10.1073/pnas.1405354111  
1050
- 1051 Sherman TD, Gao T, Fertig EJ. 2019. CoGAPS 3: Bayesian non-negative matrix  
1052 factorization for single-cell analysis with asynchronous updates and sparse data  
1053 structures. *Biorxiv* 699041. doi:10.1101/699041  
1054
- 1055 Shi Q, Gupta P, Boukhvalova AK, Singer JH, Butts DA. 2019. Functional  
1056 characterization of retinal ganglion cells using tailored nonlinear modeling. *Sci*  
1057 *Rep-uk* 9:8713. doi:10.1038/s41598-019-45048-8  
1058
- 1059 Shimogori T, Lee DA, Miranda-Angulo A, Yang Y, Wang H, Jiang L, Yoshida AC,  
1060 Kataoka A, Mashiko H, Avetisyan M, Qi L, Qian J, Blackshaw S. 2010. A  
1061 genomic atlas of mouse hypothalamic development. *Nat Neurosci* 13:767–775.  
1062 doi:10.1038/nn.2545  
1063
- 1064 Sidman RL. 1960. Histogenesis of mouse retina studied with thymidine-H-3,  
1065 ANATOMICAL RECORD. ANATOMICAL RECORD.  
1066
- 1067 Song W, Zeng Q, Xia X, Xia K, Pan Q. 2014. Atoh7 promotes retinal Müller cell  
1068 differentiation into retinal ganglion cells. *Cytotechnology* 68:267–277.  
1069 doi:10.1007/s10616-014-9777-1  
1070
- 1071 Song W, Zhang X, Xia X. 2015. Atoh7 promotes the differentiation of Müller cells-  
1072 derived retinal stem cells into retinal ganglion cells in a rat model of glaucoma.  
1073 *Exp Biol Med* 240:682–690. doi:10.1177/1535370214560965  
1074
- 1075 Soto I, Oglesby E, Buckingham BP, Son JL, Roberson EDO, Steele MR, Inman DM,  
1076 Vetter ML, Horner PJ, Marsh-Armstrong N. 2008. Retinal ganglion cells  
1077 downregulate gene expression and lose their axons within the optic nerve head  
1078 in a mouse glaucoma model. *J Neurosci Official J Soc Neurosci* 28:548–61.  
1079 doi:10.1523/jneurosci.3714-07.2008



- 1080
- 1081 Stein-O'Brien GL, Clark BS, Sherman T, Zibetti C, Hu Q, Sealton R, Liu S, Qian J,  
1082 Colantuoni C, Blackshaw S, Goff LA, Fertig EJ. 2019. Decomposing Cell Identity  
1083 for Transfer Learning across Cellular Measurements, Platforms, Tissues, and  
1084 Species. *Cell Syst* 8:395-411.e8. doi:10.1016/j.cels.2019.04.004
- 1085
- 1086 Tran NM, Shekhar K, Whitney IE, Jacobi A, Benhar I, Hong G, Yan W, Adiconis X,  
1087 Arnold ME, Lee JM, Levin JZ, Lin D, Wang C, Lieber CM, Regev A, He Z, Sanes  
1088 JR. 2019. Single-Cell Profiles of Retinal Ganglion Cells Differing in Resilience to  
1089 Injury Reveal Neuroprotective Genes. *Neuron* 104:1039-1055.e12.  
1090 doi:10.1016/j.neuron.2019.11.006
- 1091
- 1092 Trapnell C, Cacchiarelli D, Grimsby J, Pokharel P, Li S, Morse M, Lennon NJ, Livak KJ,  
1093 Mikkelsen TS, Rinn JL. 2014. The dynamics and regulators of cell fate decisions  
1094 are revealed by pseudotemporal ordering of single cells. *Nat Biotechnol* 32:381–  
1095 6. doi:10.1038/nbt.2859
- 1096
- 1097 Wang SW, Kim BS, Ding K, Wang H, Sun D, Johnson RL, Klein WH, Gan L. 2001.  
1098 Requirement for math5 in the development of retinal ganglion cells. *Gene Dev*  
1099 15:24–29. doi:10.1101/gad.855301
- 1100
- 1101 Wang YV, Weick M, Demb JB. 2011. Spectral and temporal sensitivity of cone-  
1102 mediated responses in mouse retinal ganglion cells. *J Neurosci Official J Soc*  
1103 *Neurosci* 31:7670–81. doi:10.1523/jneurosci.0629-11.2011
- 1104
- 1105 Wolf FA, Angerer P, Theis FJ. 2018. SCANPY: large-scale single-cell gene expression  
1106 data analysis. *Genome Biol* 19:15. doi:10.1186/s13059-017-1382-0
- 1107
- 1108 Wu F, Bard JE, Kann J, Yergeau D, Sapkota D, Ge Y, Hu Z, Wang J, Liu T, Mu X. 2020.  
1109 RNA-seq and scRNA-seq reveal trajectory progression of the retinal ganglion cell  
1110 lineage in wild-type and *Atoh7*-null retinas. *Biorxiv* 2020.02.26.966093.  
1111 doi:10.1101/2020.02.26.966093
- 1112
- 1113 Wu F, Kaczynski TJ, Sethuramanujam S, Li R, Jain V, Slaughter M, Mu X. 2015. Two  
1114 transcription factors, *Pou4f2* and *Isl1*, are sufficient to specify the retinal ganglion  
1115 cell fate. *Proc National Acad Sci* 112:E1559–E1568.  
1116 doi:10.1073/pnas.1421535112
- 1117
- 1118 Xiang M, Zhou L, Macke J, Yoshioka T, Hendry S, Eddy R, Shows T, Nathans J. 1995.  
1119 The Brn-3 family of POU-domain factors: primary structure, binding specificity,

- 1120 and expression in subsets of retinal ganglion cells and somatosensory neurons. *J*  
1121 *Neurosci* 15:4762–4785. doi:10.1523/jneurosci.15-07-04762.1995  
1122
- 1123 Yang Z, Ding K, Pan L, Deng M, Gan L. 2003. Math5 determines the competence state  
1124 of retinal ganglion cell progenitors. *Dev Biol* 264:240–254.  
1125 doi:10.1016/j.ydbio.2003.08.005  
1126
- 1127 Yao J, Sun X, Wang Y, Wang L. 2007. Muller glia induce retinal progenitor cells to  
1128 differentiate into retinal ganglion cells. *Neuroreport* 17:1263–1267.  
1129 doi:10.1097/01.wnr.0000227991.23046.b7  
1130
- 1131 Young RW. 1985. Cell differentiation in the retina of the mouse. *Anatomical Rec*  
1132 212:199–205. doi:10.1002/ar.1092120215  
1133
- 1134 Zhang F, Lu C, Severin C, Sretavan DW. 2000. GAP-43 mediates retinal axon  
1135 interaction with lateral diencephalon cells during optic tract formation. *Dev Camb*  
1136 *Engl* 127:969–80.  
1137
- 1138 Zhou H, Yoshioka T, Nathans J. 1996. Retina-derived POU-domain factor-1: a complex  
1139 POU-domain gene implicated in the development of retinal ganglion and  
1140 amacrine cells. *J Neurosci* 16:2261–2274. doi:10.1523/jneurosci.16-07-  
1141 02261.1996

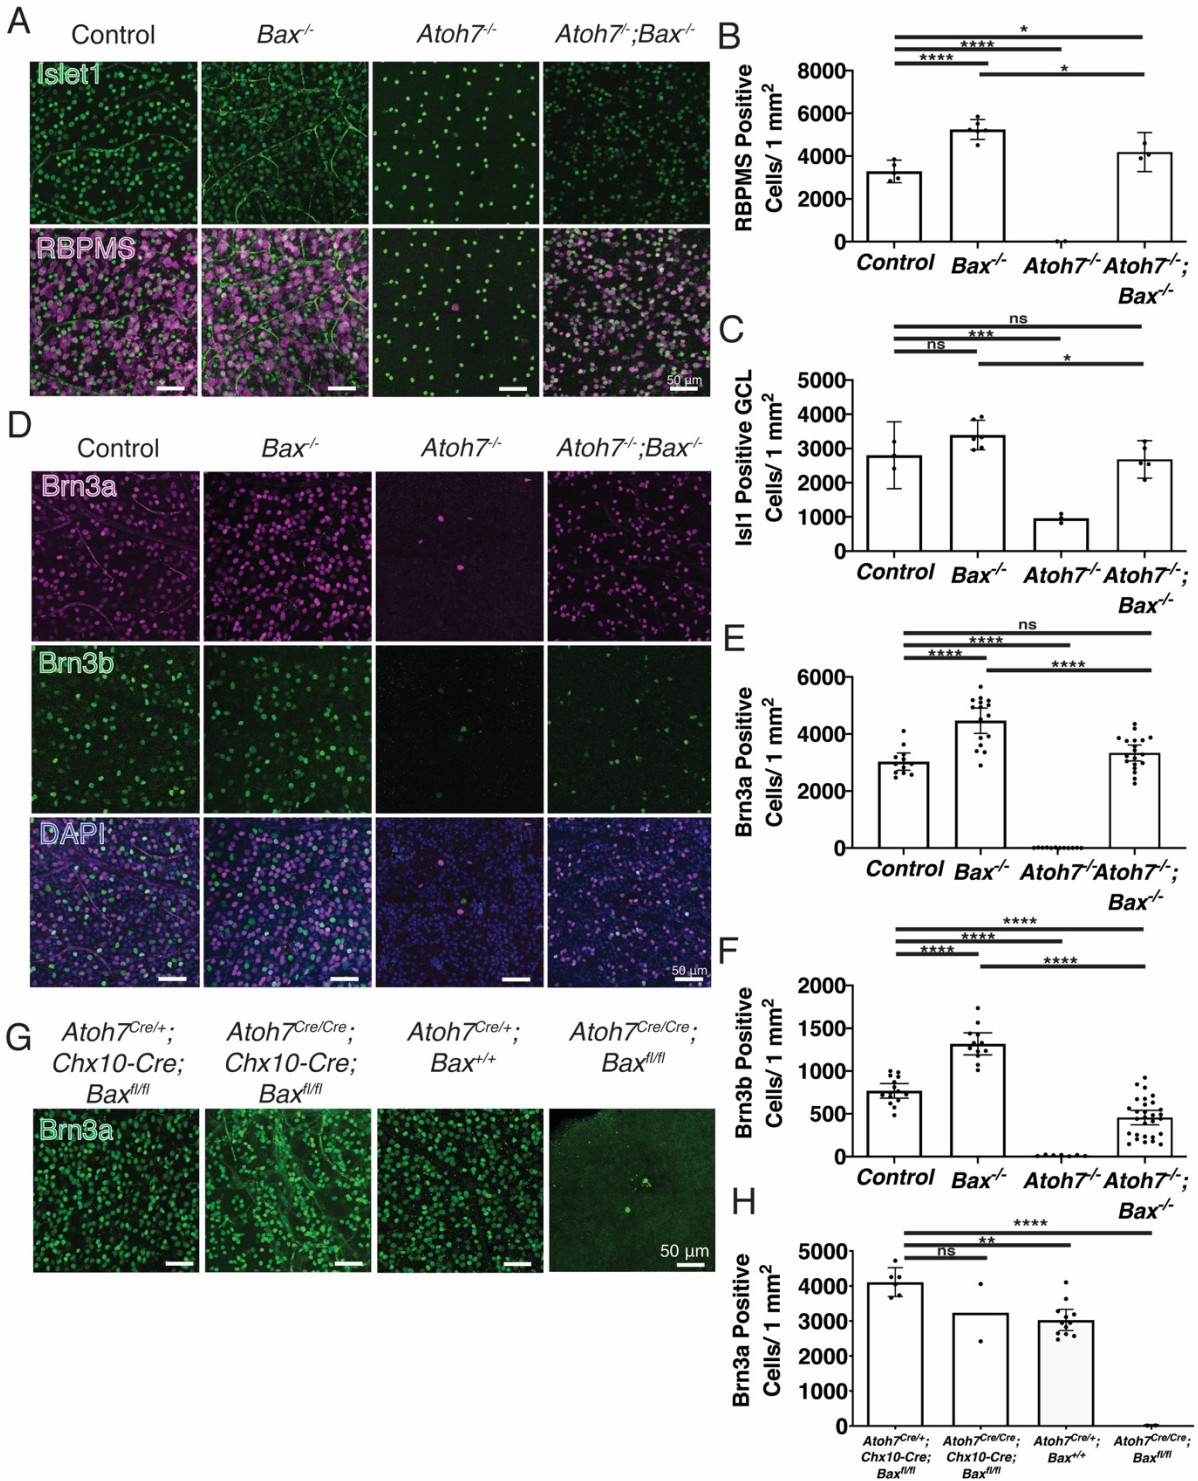

Figure 1. Brodie-Kommit et al. 2020

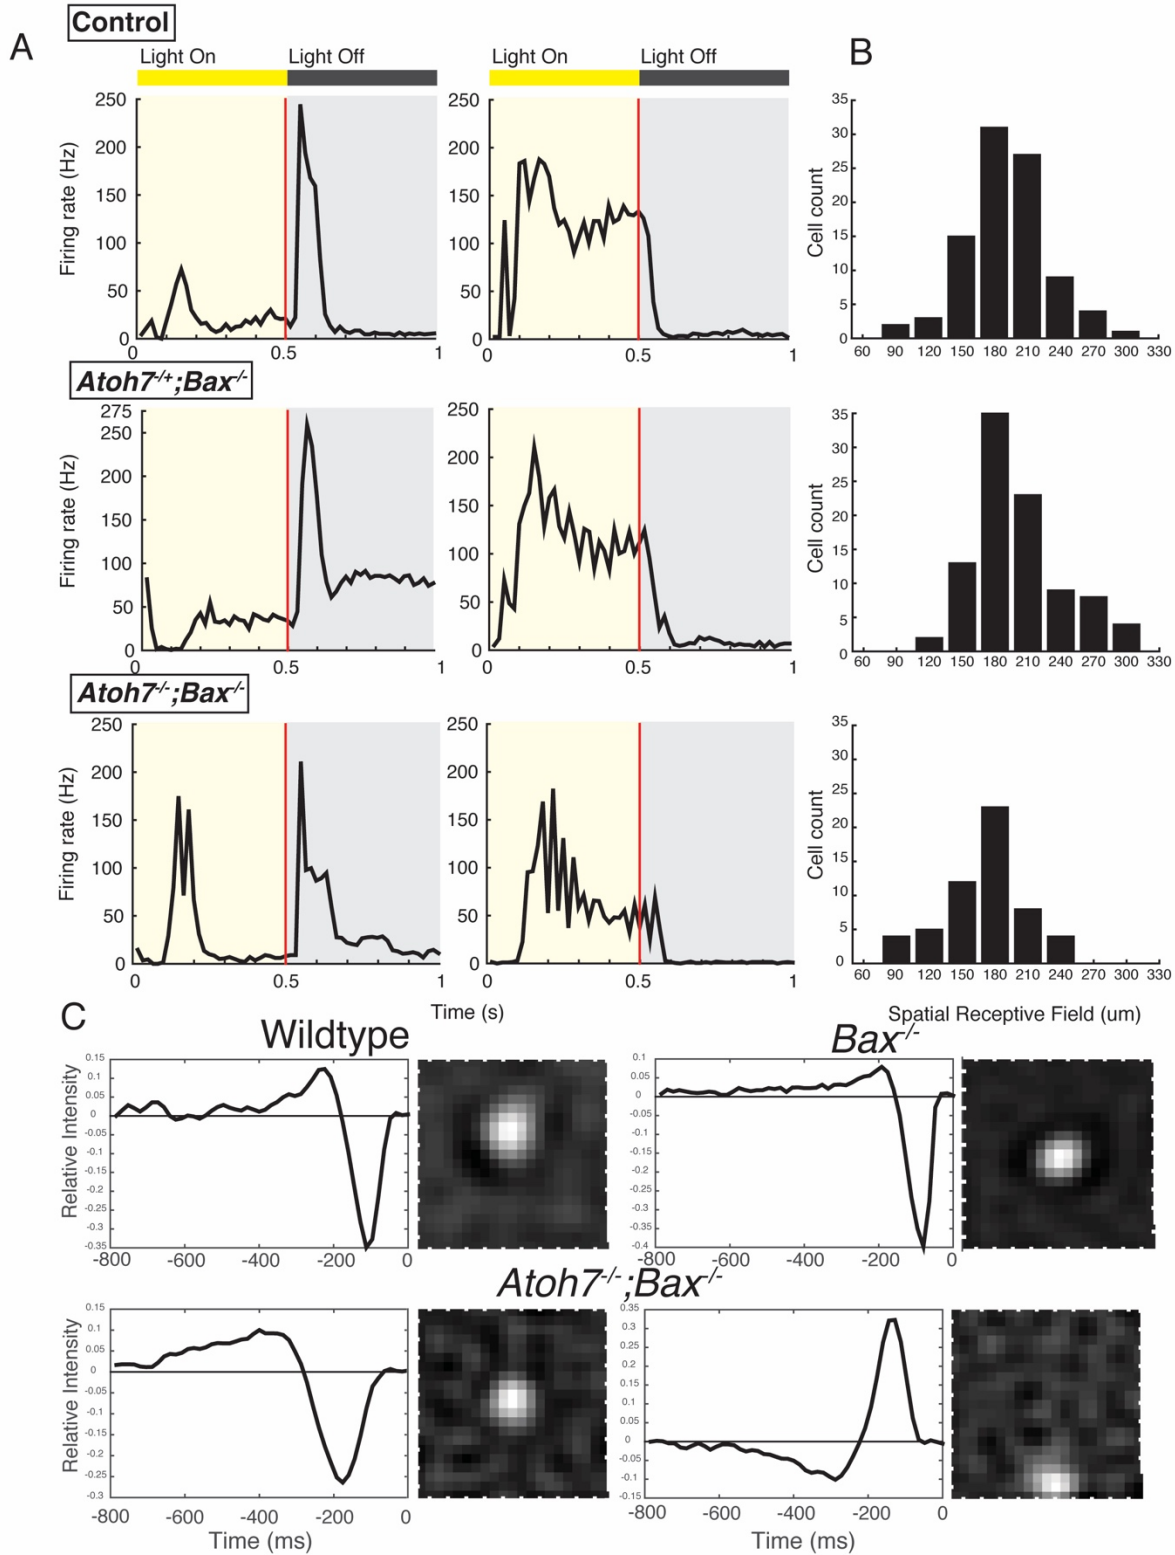

Figure 2. Brodie-Kommit et al. 2020



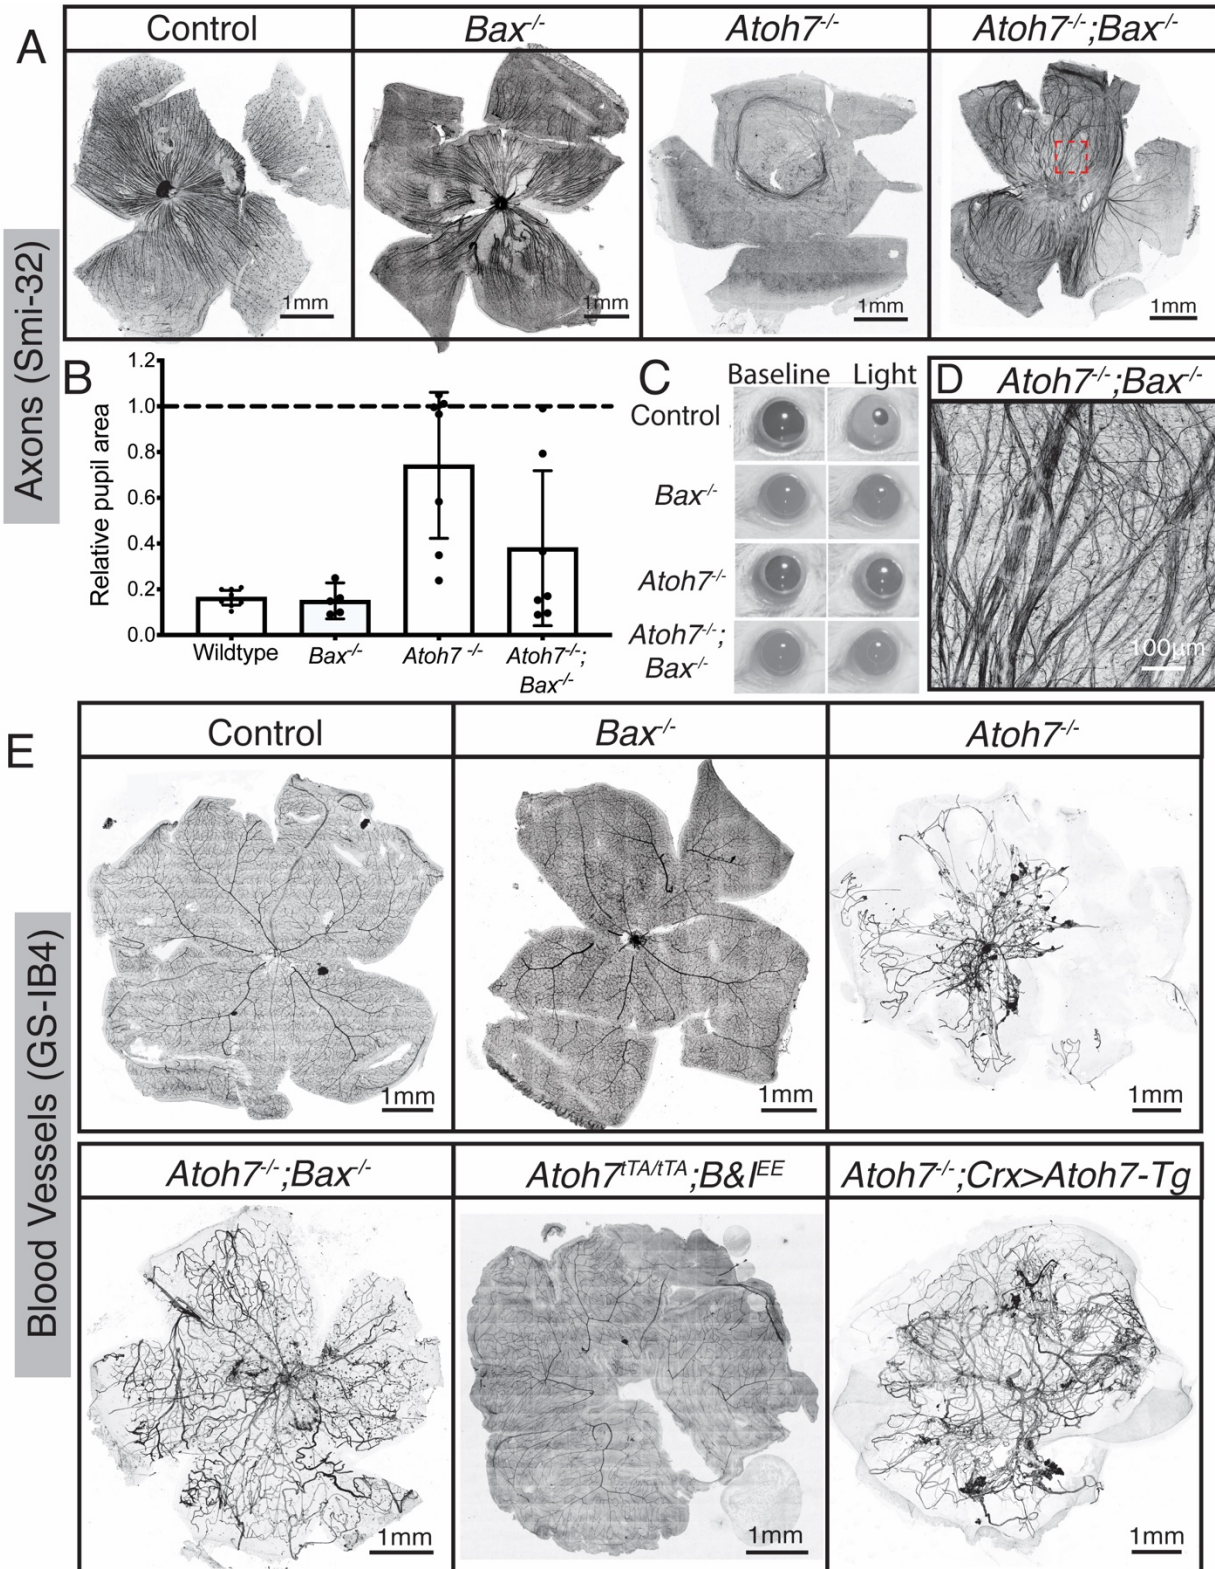

Figure 3. Brodie-Kommit et al. 2020

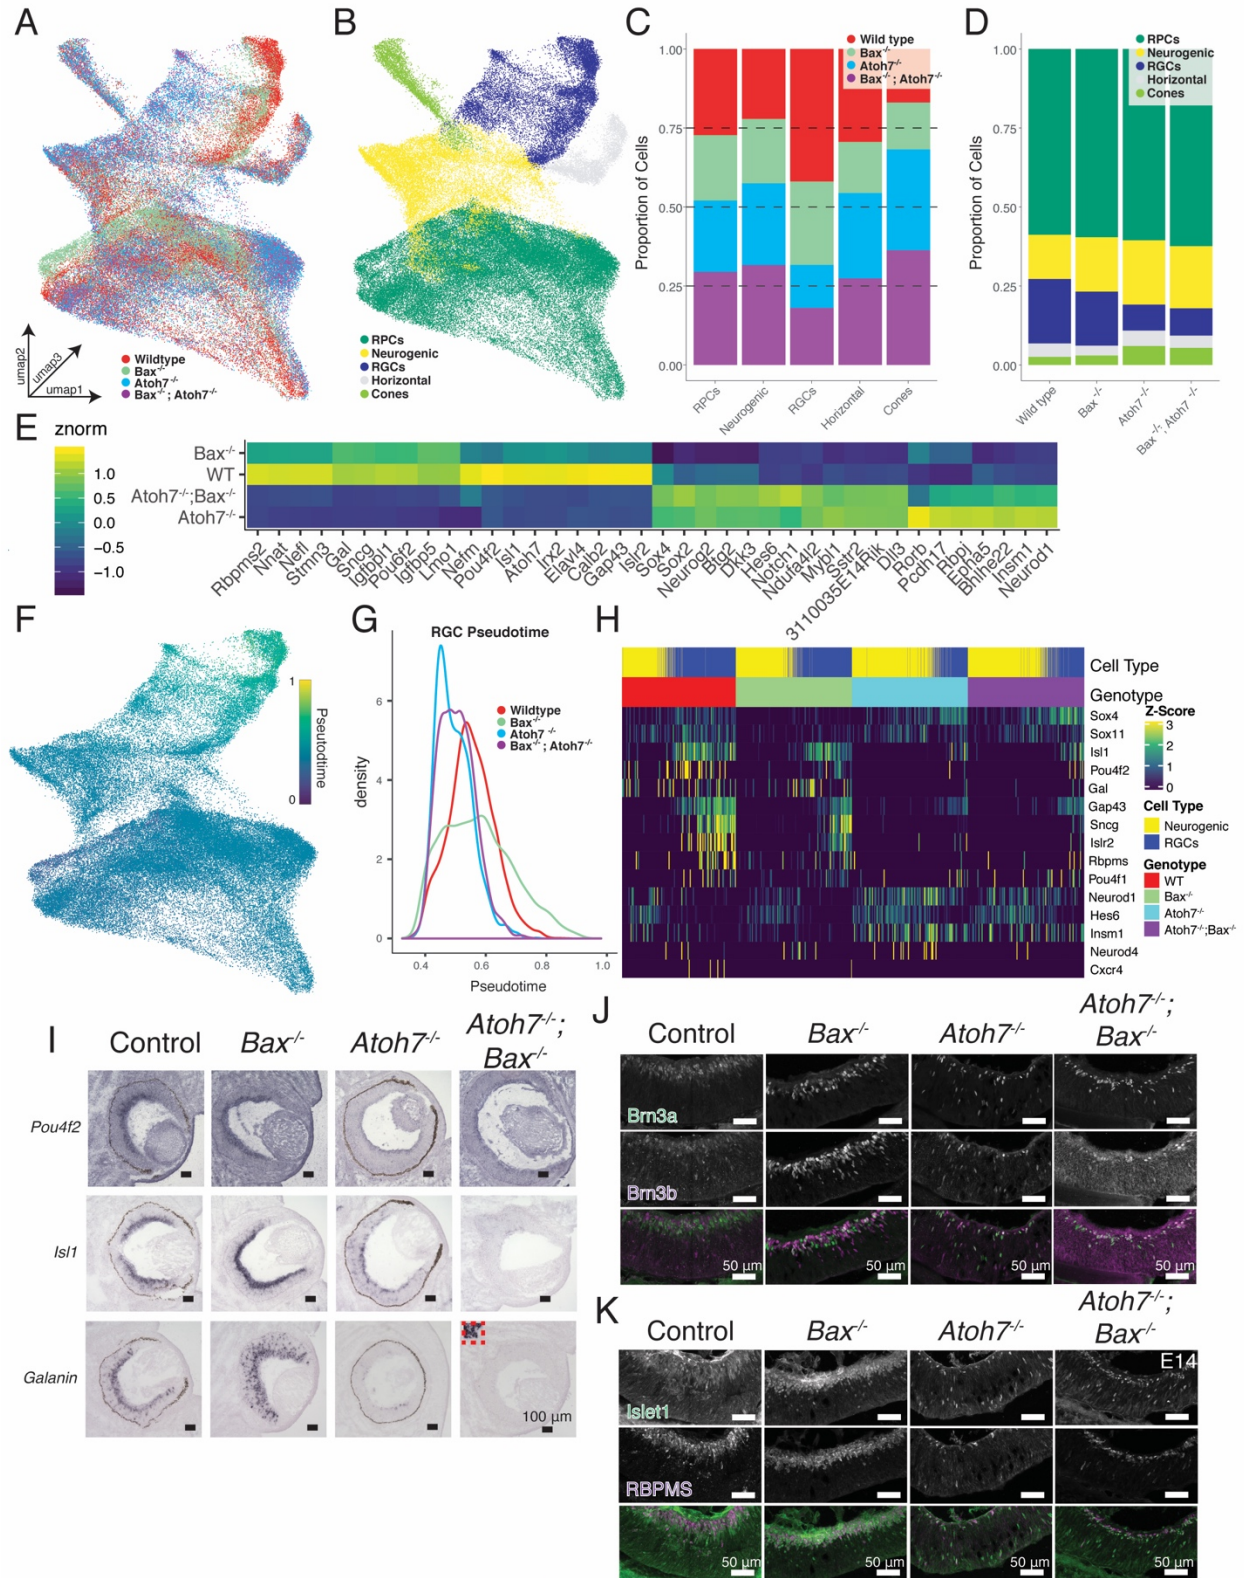

Figure 4. Brodie-Kommit et al. 2020



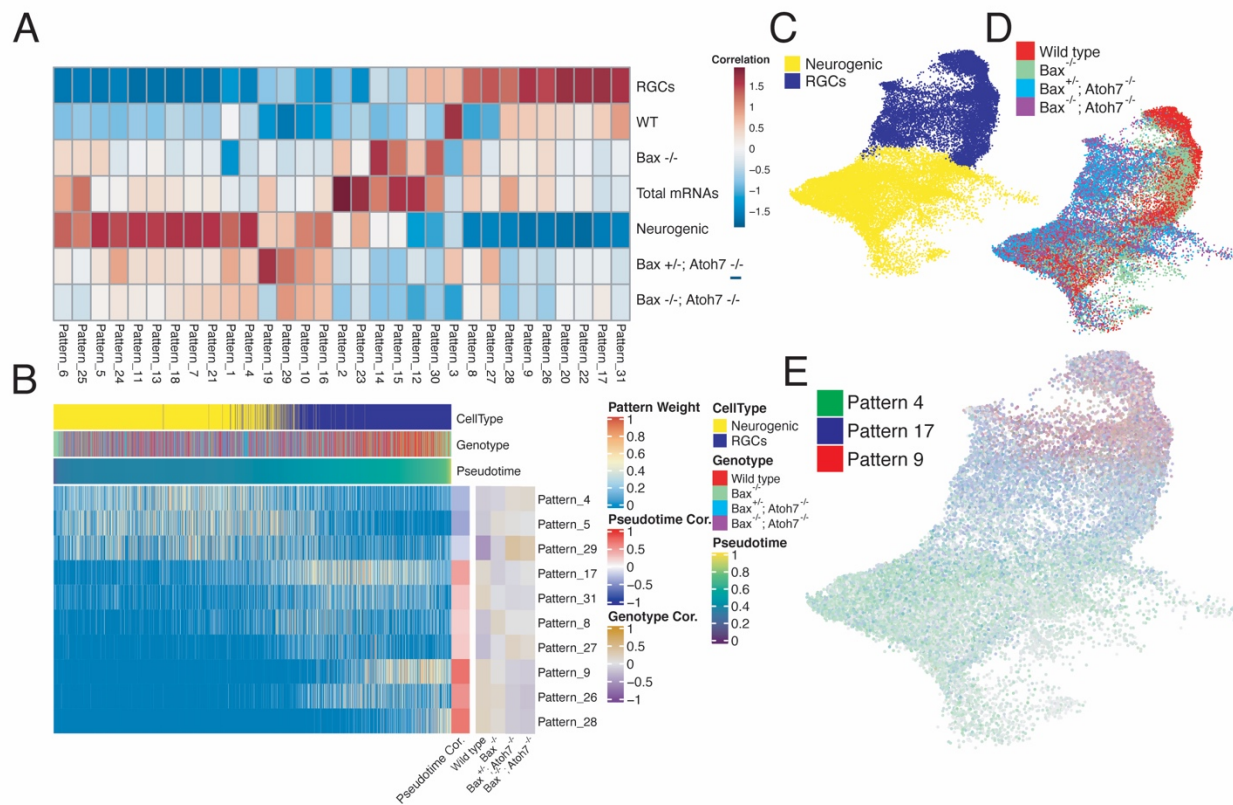

Figure 5. Brodie-Kommit et al. 2020



## 1142 **Supplemental Methods:**

1143

### 1144 **Morris water maze**

1145 Vision was tested using a cued Morris water maze (Morris, 1984). A 150cm diameter  
1146 pool was filled with water made opaque by mixing in non-toxic white tempera paint. A  
1147 platform ("island", not visible from the surface of the water) was placed in one quadrant  
1148 with a black and white striped 50 mL conical tube on top as a "flag". Each of six animals  
1149 in a group (either *Atoh7<sup>-/+</sup>*, *Atoh7<sup>-/-</sup>*, or *Atoh7<sup>-/-</sup>;Bax<sup>-/-</sup>*) was allowed a 90 second trial in  
1150 which to swim and visually locate the island. If the animal found the island, it was  
1151 allowed to remain on the island for 60 seconds before being removed from the pool. If  
1152 the animal did not locate the island, it was placed at the edge of the island, allowed to  
1153 climb on, and remain on the island for 60 seconds to reinforce the island as a safe spot.  
1154 Following the first trial, the island was moved to a different quadrant and animals were  
1155 tested again. In total, four trials were completed with the island in four different  
1156 locations.

1157

### 1158 **Visual tracking**

1159 Visual acuity was assessed using OptoMotry (Cerebral Mechanics). Animals were  
1160 placed on a platform in the viewing chamber and allowed to adapt for 10 minutes prior  
1161 to testing. Testing was done for five minutes, during which the position of the animal's  
1162 head was monitored to assess visual tracking. Following each tracking event, the  
1163 direction and width of the grating was changed, eventually narrowing down to smaller  
1164 ranges of acuity.

1165

### 1166 **X-Gal Staining**

1167 To examine ipRGCs and projections in animals with one allele of *Opn4<sup>tauLacZ/+</sup>*, adult  
1168 animals were transcardially perfused with 10 mL PBS followed by 15 mL of 4% PFA.  
1169 Brains were dissected and cryoprotected in 30% sucrose in PBS until the tissue had  
1170 sunk in the solution (kept at 4°C) and then frozen in OCT. Cryosections (50 µm) were  
1171 mounted on slides and allowed to dry up to 8 hours at room temperature. All X-Gal

1172 staining solutions were prepared according to (Mombaerts et al., 1996). Slides were  
1173 rehydrated in Buffer B for 10 minutes, then immersed in Buffer C (with potassium  
1174 ferricyanide, potassium ferrocyanide and 100 mg/mL X-Gal in N-N' dimethyl formamide  
1175 (DMF)) for 2 days in a dark container. On the third day, fresh Buffer C was added to the  
1176 slides which were allowed to sit overnight. Following staining, slides were washed 3  
1177 times for 5 minutes in PBS, counterstained in Nuclear FastRed (diluted 1:5 in water) for  
1178 10 minutes, washed in 70% ethanol, and mounted in glycerol. Retinas were dissected in  
1179 phosphate buffer and placed in X-Gal Buffer B for 10 minutes, then Buffer C for 2 days  
1180 at room temperature in a dark container. On the third day, fresh Buffer C was added,  
1181 and retinas were stained for an additional day. Following staining, retinas were washed  
1182 3 times for 5 minutes in PBS, washed in 70% ethanol, and flat mounted in glycerol.

1183

#### 1184 **CtB sectioning and visualization**

1185 Pulled glass needles were filled via capillary action with roughly 5  $\mu$ L of Alexa 488  
1186 conjugated Cholera toxin b subunit (CTb; Invitrogen) diluted to 5mg/mL in dH<sub>2</sub>O. Filled  
1187 needles were affixed to a Harvard Apparatus FIL-190 picospritzer. For injection, adult  
1188 animals were anaesthetized with 25ul/g body weight Avertin (1.25% tri-bromo-ethanol  
1189 and 2.5% tertiary-amyl alcohol in dH<sub>2</sub>O) and tested for alertness via toe pinch. Gentle  
1190 pressure was applied behind the eye to raise it, the needles were aimed just above the  
1191 skin margin, and CTb was injected in the intraocular space. Animals were allowed to  
1192 recover and maintained for three days post-injection to allow the tracer to reach the  
1193 distal axons tips. Following the three-day survival period, animals were transcardially  
1194 perfused with 15 mL of PBS, followed by 25 mL of cold 4% PFA. Brains were dissected  
1195 after perfusion and post-fixed in 4% PFA for 1 hour, then cryoprotected in 30% sucrose.  
1196 Brains were frozen in OCT and sectioned at 50  $\mu$ m in a cryostat. Sections were dried  
1197 overnight, fixed in 4% PFA for 10 min, mounted in VectaShield (Vector Labs)+1.5  
1198 mg/mL DAPI and imaged on a Zeiss Imager M1 upright epifluorescence microscope  
1199 (AxioVision software).

## 1200 **Supplemental Figure Legends**

1201

1202 **Supplemental Table 1.** 230 differentially expressed transcripts (q-value < 1e-300)  
1203 between control (control and *Bax*<sup>-/-</sup>) versus *Atoh7*-deficient (*Atoh7*<sup>-/-</sup>, or *Atoh7*<sup>-/-</sup>;*Bax*<sup>-/-</sup>)  
1204 neurogenic and retinal ganglion cells.

1205

1206 **Supplemental Table 2.** Differentially expressed transcripts (q-value < 1e-5) across the  
1207 interaction of pseudotime and genotype.

1208

1209 **Supplemental Figure 1.** (A,B) Whole retinal dissection showing the presence of Brn3a  
1210 and Brn3b positive RGCs respectively. Notice the orientation of the retinas as marked  
1211 by the orientation rose. Highlighted regions (A,B) are magnified in (A',B'). (C,D,E,F)  
1212 IpRGCs are partially rescued by preventing apoptosis. (C,D) To determine if ipRGCs  
1213 were undergoing apoptosis in the *Atoh7*<sup>-/-</sup>, ipRGC numbers were examined in *Atoh7*<sup>-/-</sup>  
1214 and *Atoh7*<sup>-/-</sup>;*Bax*<sup>-/-</sup>. ipRGCs in the *Atoh7*<sup>-/-</sup>;*Bax*<sup>-/-</sup> were rescued to 60% of wild type levels.  
1215 *Bax*<sup>-/-</sup> showed a 202±9% increase in ipRGCs compared to controls, similar to what has  
1216 been reported for other RGCs in the *Bax*<sup>-/-</sup> knockout. (E,F) To determine if ipRGCs were  
1217 generated in development in *Atoh7*<sup>-/-</sup> mice, I examined E16 and P0 timepoints using the  
1218 *Opn4*<sup>tauLacZ</sup> marker. At both E16 and P0, a 90% deficit of ipRGCs was observed. Mean ±  
1219 95% confidence intervals. Statistical significance tested by one-way ANOVA with  
1220 Tukey's post test for multiple comparisons \*\* p=0.0052, \*\*\*\* p < 0.0001.

1221

1222 **Supplemental Figure 2.** *Atoh7*<sup>Cre</sup>;*R26*<sup>tdTomato</sup> lineage labeling in detail. (A,B) A similar  
1223 percent of RGCs are of the *Atoh7* lineage in both wildtype and *Atoh7*<sup>-/-</sup>;*Bax*<sup>-/-</sup> mice.  
1224 Yellow arrows highlight Brn3a+ and *Atoh7*-expressing RPC-derived RGCs while blue  
1225 arrows highlight non-Brn3a+ cells in the GCL (ganglion cell layer). (C)  
1226 *Atoh7*<sup>Cre</sup>;*R26*<sup>tdTomato</sup> labels cells of most cell types in the retina in all genotypes  
1227 examined. Abbreviations: GCL, INL (inner nuclear layer), ONL (outer nuclear layer).

1228

1229 **Supplemental Figure 3.** During early development, E12.5, *Atoh7*<sup>-/-</sup>;*Bax*<sup>-/-</sup> mice have  
1230 both fewer Brn3a positive RGCs and mature RGCs. (A) Pax2 antibody staining was

1231 used to help find the central retina to make sure the earliest born RGCs in the central  
1232 retina were fully sampled. (B) Quantification of the retinal images with the black bars  
1233 representing density and the red bar plotted on the right side representing the percent of  
1234 mature RGCs. Mean  $\pm$  95% confidence intervals. Statistical Significance tested by  
1235 unpaired t test \*\*  $p = 0.0099$  \*\*\*\*  $p < 0.0001$ . Abbreviations: RGCs, retinal ganglion  
1236 cells; GCL, ganglion cell layer.

1237  
1238 **Supplemental Figure 4.** Peristimulus time histogram averaged from 120 repetition of 1-  
1239 Hz square wave flash of every RGC recorded from in *Atoh7<sup>-/-</sup>;Bax<sup>-/-</sup>* mice. The red line  
1240 represents the transition from Light on to Light off in the square wave light flash.

1241  
1242 **Supplemental Figure 5.** Similar results seen with Tuj1 (A), NFM, and NFH (B)  
1243 immunostaining as seen with Smi-32 staining. (C) More examples of orientation  
1244 preserved dissection of whole retinas of all four genotypes and stained with an antibody  
1245 to Smi-32, notice the orientation of the retinas as marked by the orientation rose.

1246  
1247 **Supplemental Figure 6.** RGCs in *Atoh7<sup>-/-</sup>;Bax<sup>-/-</sup>* mice do not sustain visual tasks. In the  
1248 virtual optometer, animals visually track a moving grating of varied widths. (A) Only wild  
1249 type animals were able to track gratings with an acuity of 0.4 cycles/degree. In the cued  
1250 Morris Water Maze (B) animals locate a marked platform to escape the water. In four  
1251 successive trials, most wild type animals learned to locate the platform relatively quickly.  
1252 (C) ipRGC projections do not reach the brain in *Atoh7<sup>-/-</sup>;Bax<sup>-/-</sup>* mice. The projections of  
1253 ipRGCs were genetically labeled with the tauLacZ marker (depicted here as *Opn4<sup>+/-</sup>*) in  
1254 the *Atoh7<sup>-/-</sup>;Bax<sup>-/-</sup>* background. Robust innervation is revealed by X-Gal staining in the  
1255 control while the *Atoh7<sup>-/-</sup>;Bax<sup>-/-</sup>* mice do not show innervation (target nuclei outlined in  
1256 red). (n=3, scale bars = 100mm). (D) Fluorescently conjugated Cholera toxin b labels  
1257 RGC projections. Non-image forming (SCN, OPN) and image-forming targets (LGN,  
1258 SC) do not receive retinal innervation in *Atoh7<sup>-/-</sup>* or *Atoh7<sup>-/-</sup>;Bax<sup>-/-</sup>* mice. Yellow outlines  
1259 depict targets; All scale bars 100mm, n=3 per genotype. Mean  $\pm$  95% confidence  
1260 intervals. Statistical significance tested by one-way ANOVA with Tukey's post test for  
1261 multiple comparisons \*  $p=0.0386$ , \*\*\*\*  $p < 0.0001$ . Abbreviations: SCN: Suprachiasmatic

1262 nucleus, OPN: Olivary Pretectal Nucleus, LGN: Lateral geniculate nucleus, SC:  
1263 Superior colliculus.

1264  
1265 **Supplemental Figure 7.** Traces of Pupillary light reflex (PLR) of individual mice before  
1266 and after light stimulus for contralateral (A) and ipsilateral (D) recordings. *Bax*<sup>-/-</sup> and  
1267 *Atoh7*<sup>-/-</sup>;*Bax*<sup>-/-</sup> mice lack retinal pigmentation therefore their pupils are outlined for clarity.  
1268 Analysis of the relative pupil area of all of the PLR responses between genotypes for  
1269 contralateral (B) and ipsilateral (C). Mean ± 95% confidence intervals.

1270  
1271 **Supplemental Figure 8.** (A) Table of scRNA-seq statistics for each sample. (B-C)  
1272 Boxplots of the number of (B) Expressed Genes and (C) Unique molecular identifier  
1273 (UMI) or transcript counts within each cell. (D) UMAP dimension reduction of the  
1274 aggregate single cell datasets with individual cells colored by originating sample  
1275 identity. (E) UMAP dimension reductions displaying the subset of cells corresponding to  
1276 each genotype (top) and the cell type annotations (bottom) of the corresponding cells.  
1277 (F) Cell type annotations of cells within each scRNA-seq sample. (G) Heatmap of  
1278 known cell type markers within annotated cell types.

1279  
1280 **Supplemental Figure 9.** (A) Dotplot of a subset of marker genes used to determine cell  
1281 type annotations of clusters within UMAP dimension reduction space. Color of the circle  
1282 corresponds to the log() of the mean expression of individual transcripts within cells of  
1283 each cluster. Size of the circles corresponds to the percentage of cells within the cluster  
1284 that had at least one transcript detected. (B) Heatmap of the cell type enrichment of  
1285 *Atoh7*-dependent, differentially expressed transcripts across wildtype mouse retinal  
1286 development (E11-P14) as assayed by Clark et al., 2019.

1287  
1288 **Supplemental Figure 10.** Pseudotime heatmap of top 10 weighted genes of  
1289 scCoGAPS Patterns. Cells are ordered by pseudotime.

1290  
1291 **Supplemental Figure 11.** Pseudotime heatmap of previously published RGC subtype  
1292 markers and their correlation to pseudotime.

1293

1294 **Supplemental Figure 12.** (A) Immunohistochemistry images of the RGC layer stained  
1295 for Brn3a and RBPMS in Galanin heterozygous and knockout retinas. (B) Cell counts of  
1296 RGCs indicate no difference in RGC number in P8 galanin-deficient retinas.

1297

1298 **Supplemental References**

1299

1300 Mombaerts P, Wang F, Dulac C, Chao SK, Nemes A, Mendelsohn M,  
1301 Edmondson J, Axel R. 1996. Visualizing an Olfactory Sensory Map. *Cell* 87:675–  
1302 686. doi:10.1016/s0092-8674(00)81387-2

1303

1304 Morris R. 1984. Developments of a water-maze procedure for studying spatial  
1305 learning in the rat. *J Neurosci Meth* 11:47–60. doi:10.1016/0165-0270(84)90007-  
1306 4



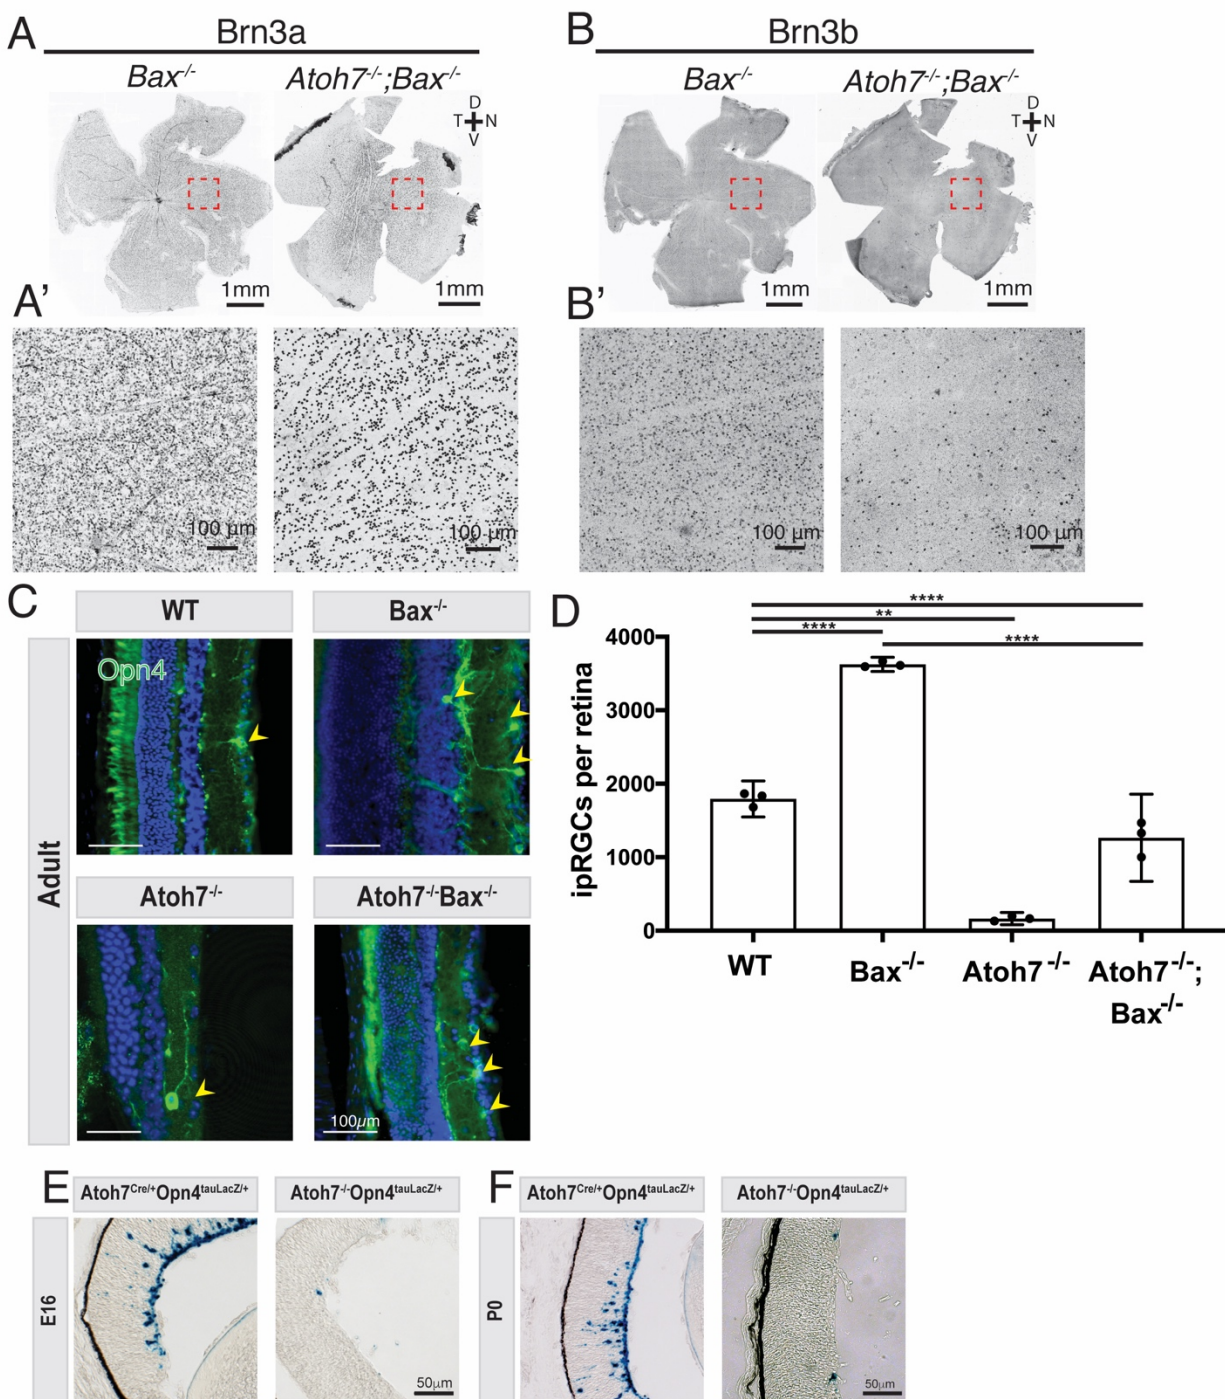

Supplemental Figure 1. Brodie-Kommit et al. 2020



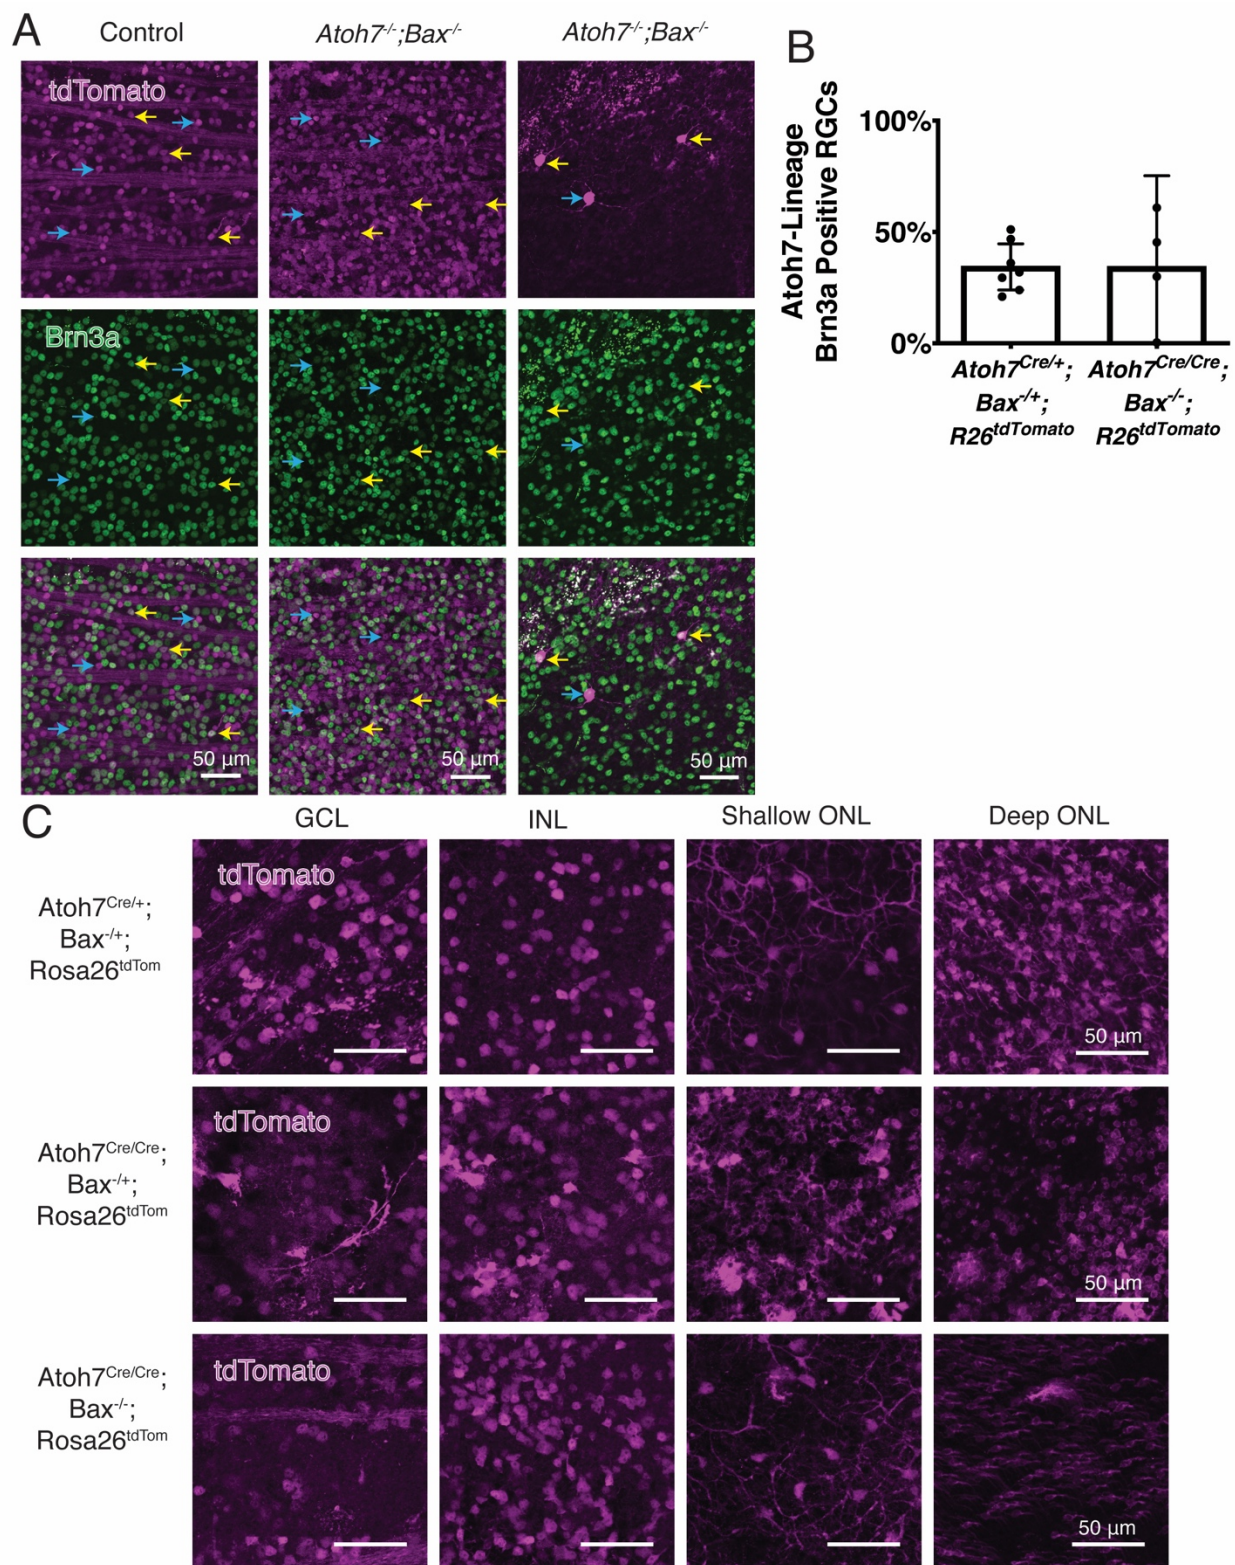

Supplemental Figure 2. Brodie-Kommit et al. 2020

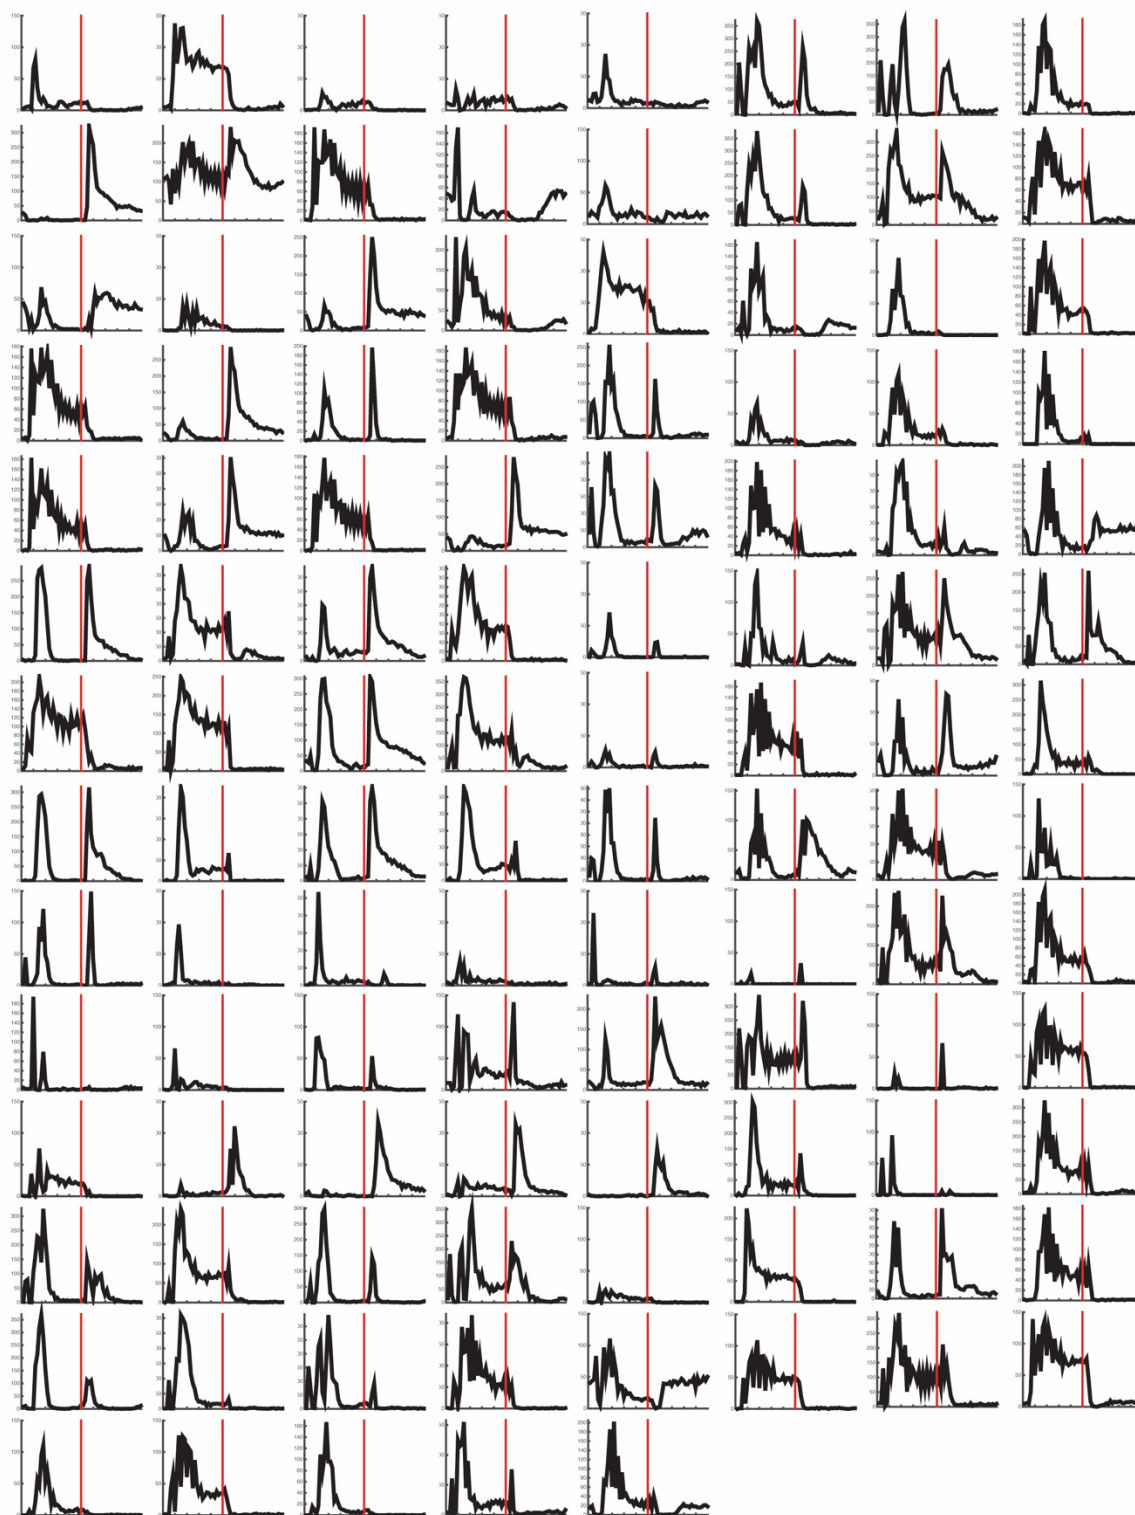

Supplemental Figure 3. Brodie-Kommit et al. 2020



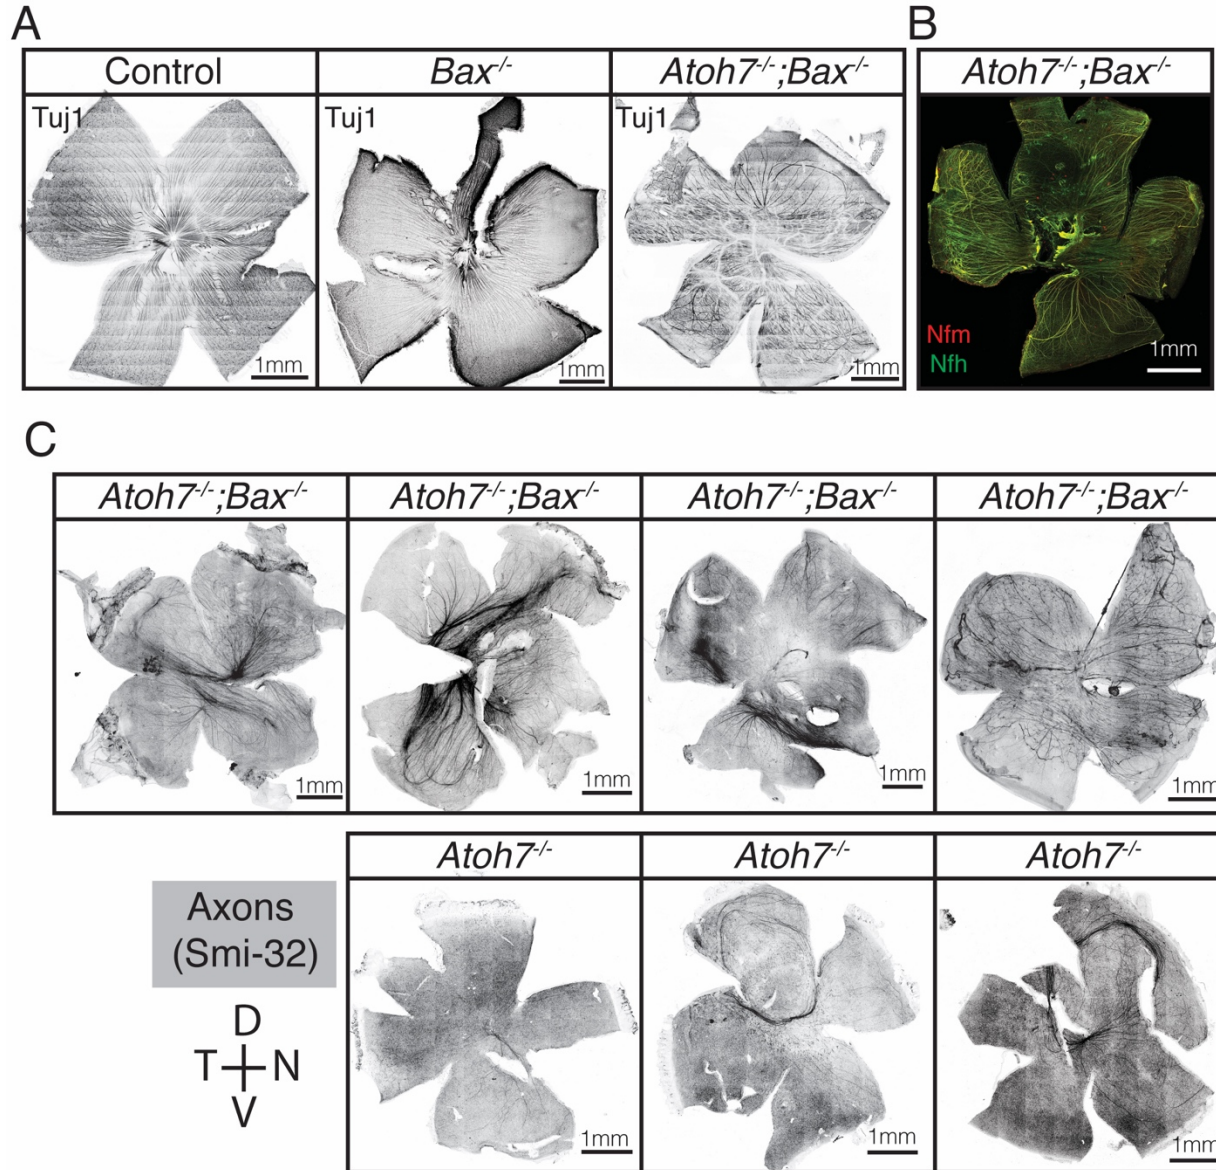

Supplemental Figure 4. Brodie-Kommit et al. 2020

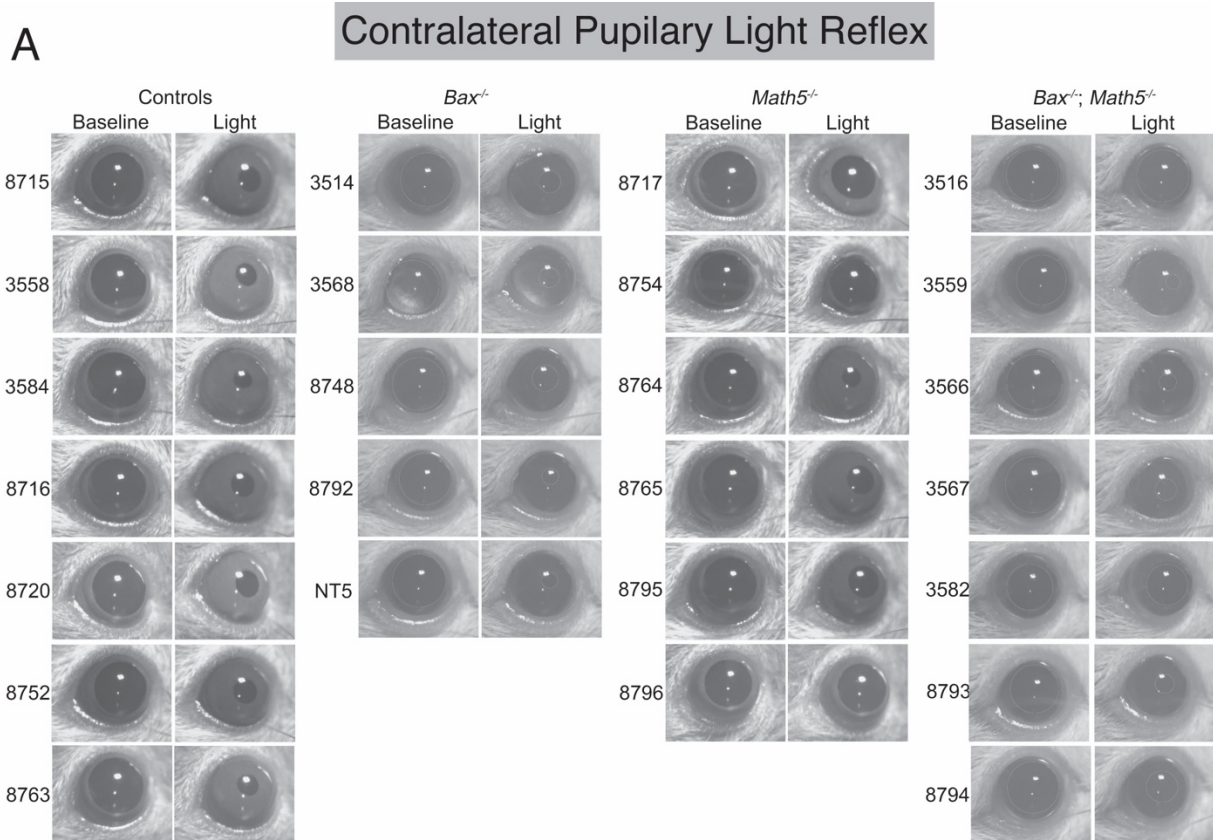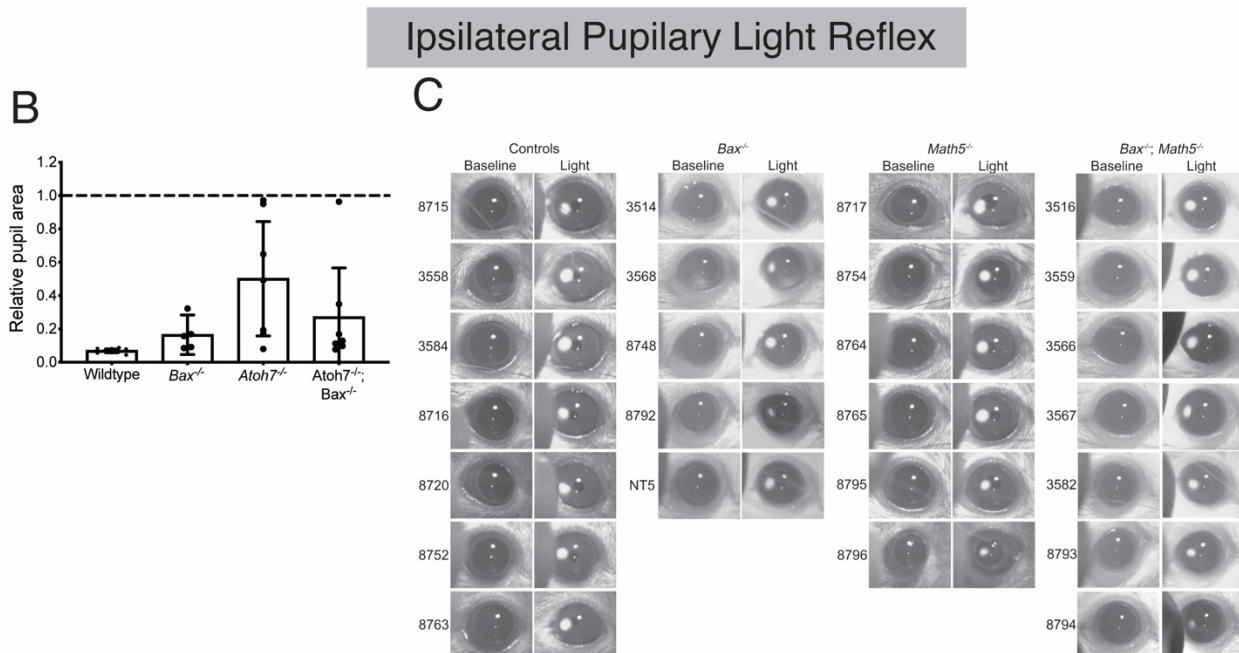

Supplemental Figure 5. Brodie-Kommit et al. 2020

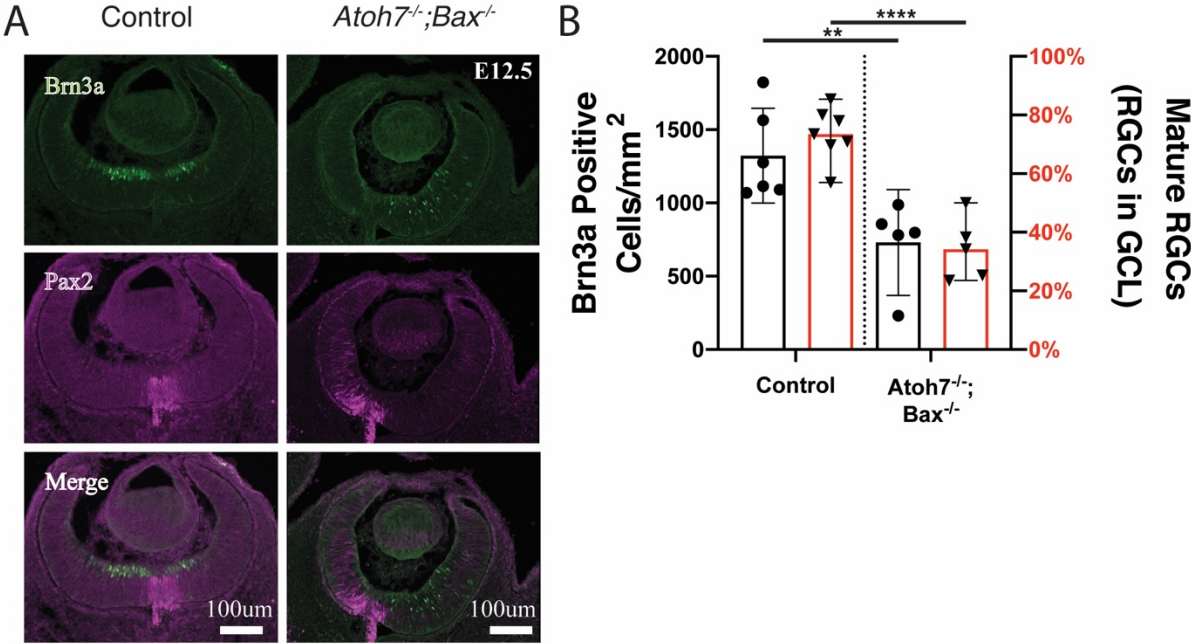

Supplemental Figure 6. Brodie-Kommit et al. 2020



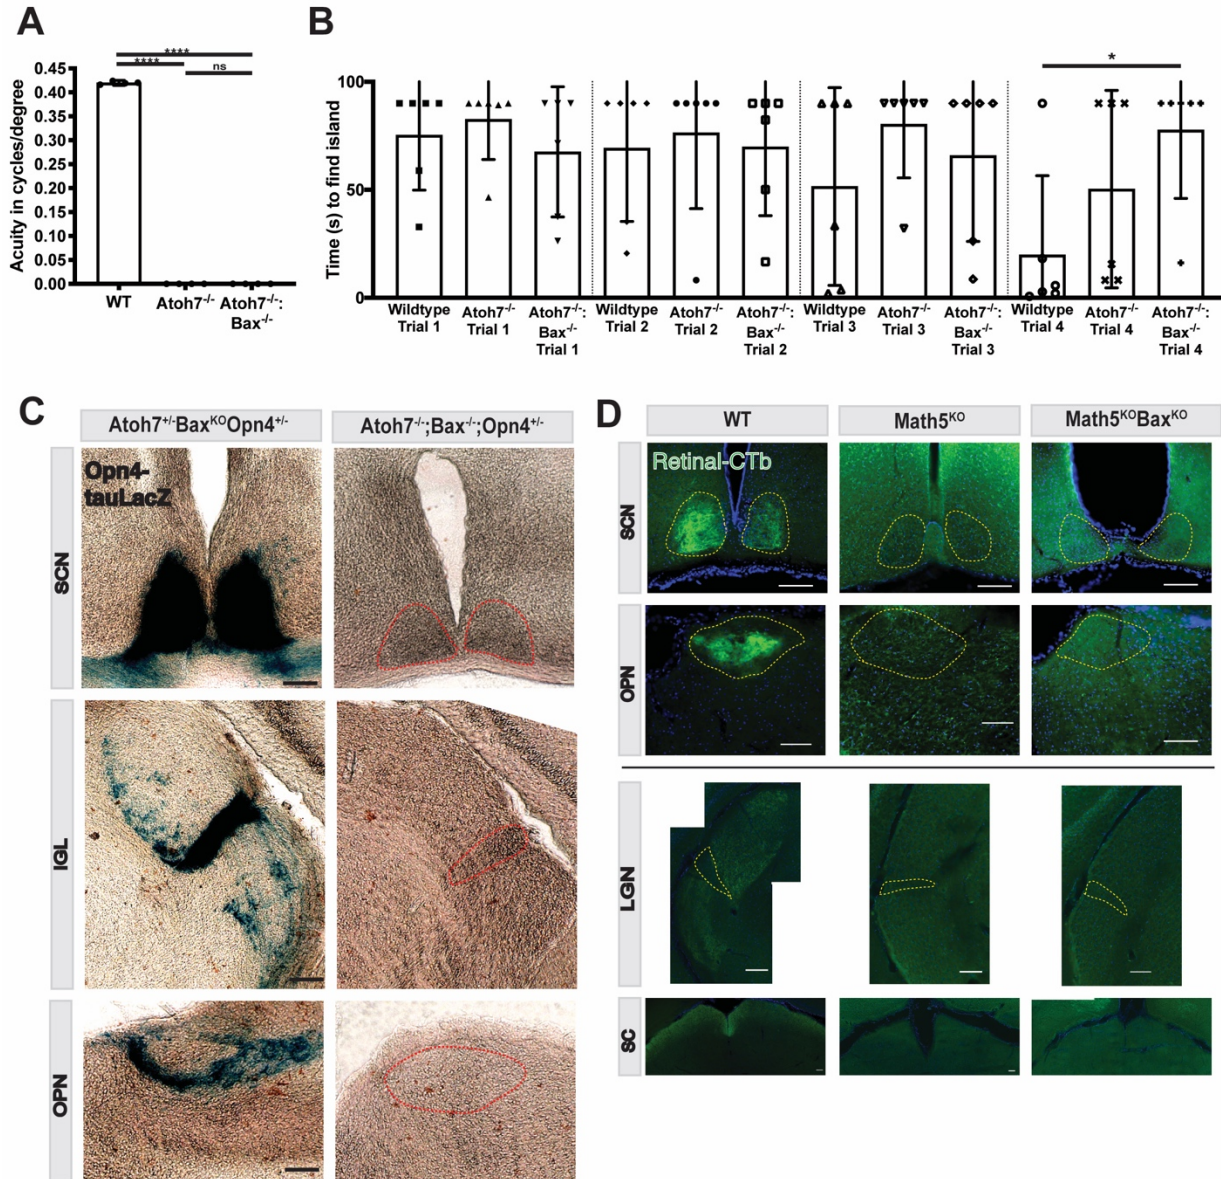

Supplemental Figure 7. Brodie-Kommit et al. 2020

A

| Sample                   | # Cells | Mean UMI | Mean Genes | Age | Genotype           | Source                                       |
|--------------------------|---------|----------|------------|-----|--------------------|----------------------------------------------|
| WT_rep1                  | 15582   | 1392     | 871        | E14 | CD1 Wild-type      | (Clark <i>et al.</i> , 2019; <i>Neuron</i> ) |
| WT_rep2                  | 10496   | 2789     | 1491       | E14 | CD1 Wild-type      | (Clark <i>et al.</i> , 2019; <i>Neuron</i> ) |
| Bax_Het_Atoh7_Null_rep1  | 9622    | 3029     | 1465       | E14 | Bax +/-; Atoh7 -/- | This Study                                   |
| Bax_Het_Atoh7_Null_rep1  | 11345   | 2547     | 1299       | E14 | Bax +/-; Atoh7 -/- | This Study                                   |
| Bax_Null_rep1            | 10268   | 6144     | 1951       | E14 | Bax -/-; Atoh7 +/+ | This Study                                   |
| Bax_Null_rep2            | 9269    | 7185     | 2130       | E14 | Bax -/-; Atoh7 +/+ | This Study                                   |
| Bax_Null_Atoh7_Null_rep1 | 14730   | 2269     | 1193       | E14 | Bax -/-; Atoh7 -/- | This Study                                   |
| Bax_Null_Atoh7_Null_rep2 | 11816   | 1901     | 1098       | E14 | Bax -/-; Atoh7 -/- | This Study                                   |

B

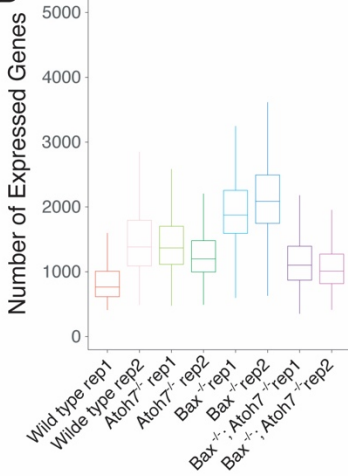

C

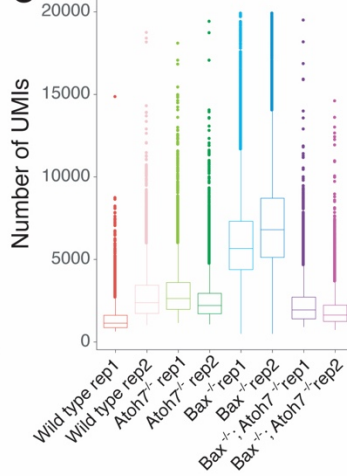

D

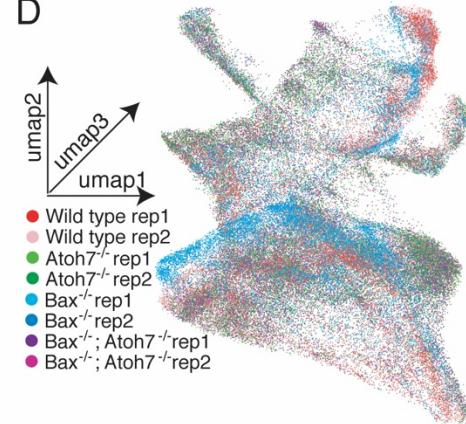

E

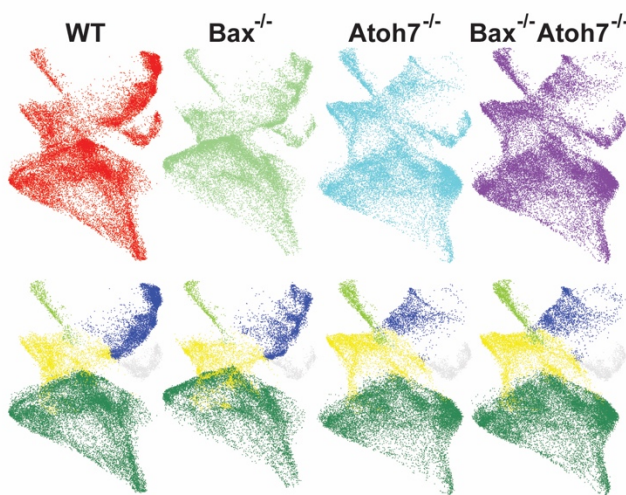

F

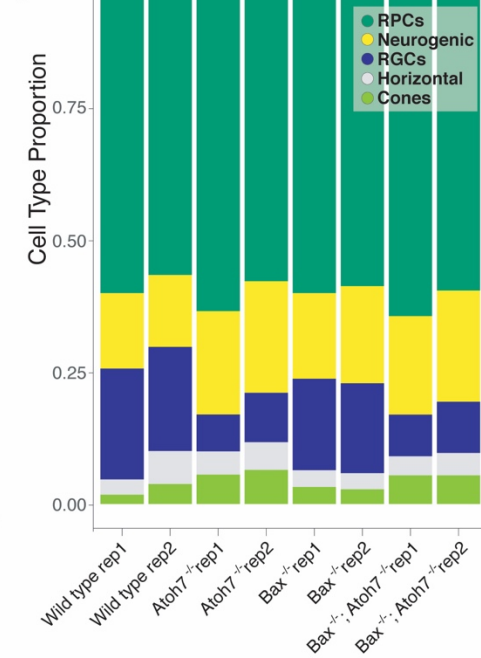

G

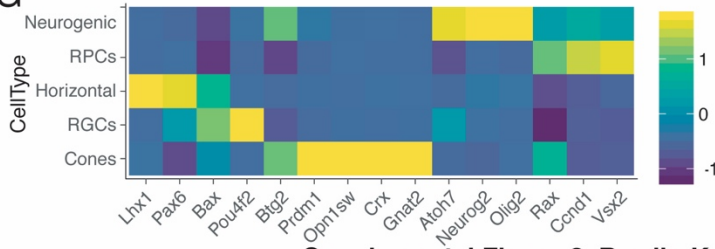

Supplemental Figure 8. Brodie-Kommit et al. 2020



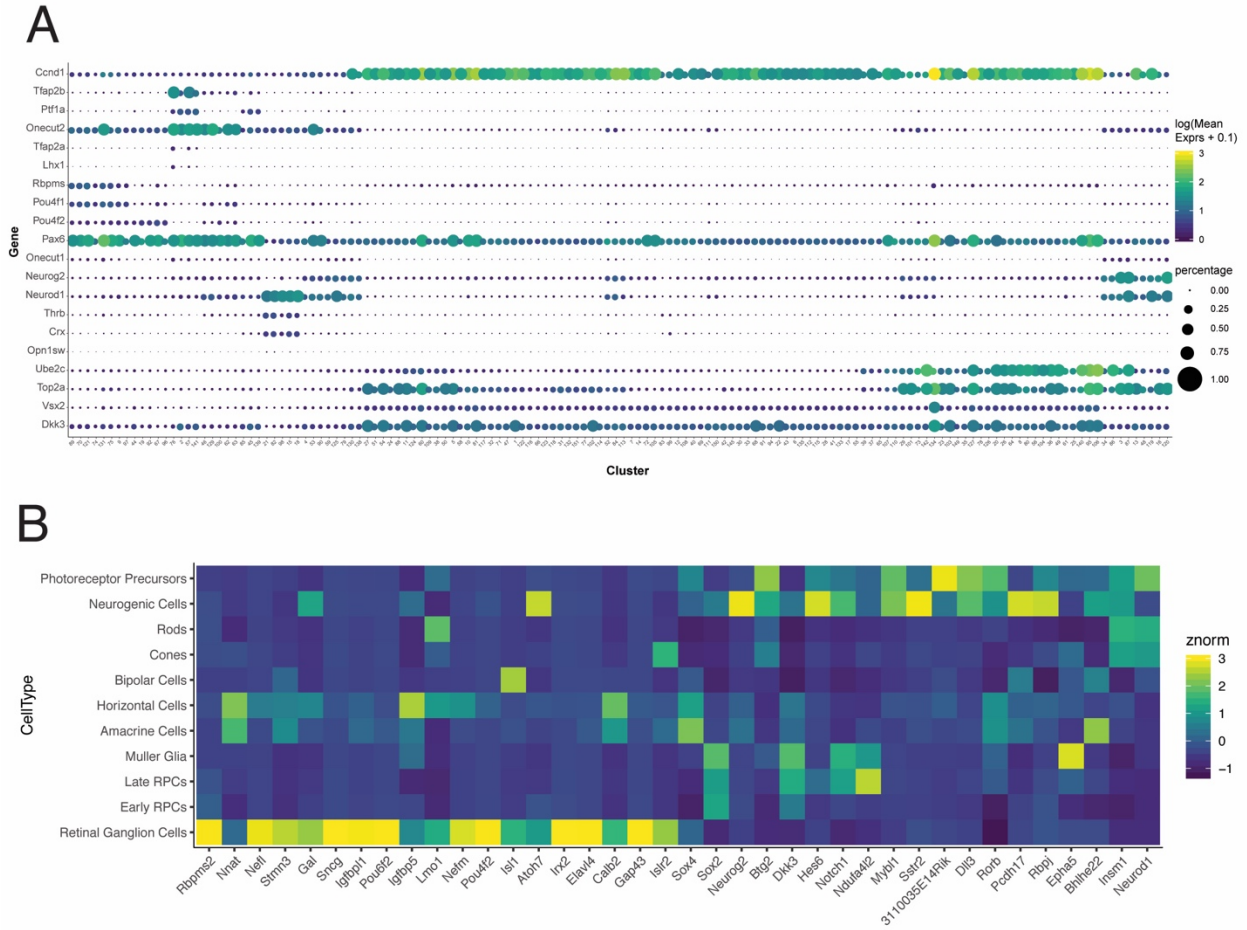

Supplemental Figure 9. Brodie-Kommit et al. 2020

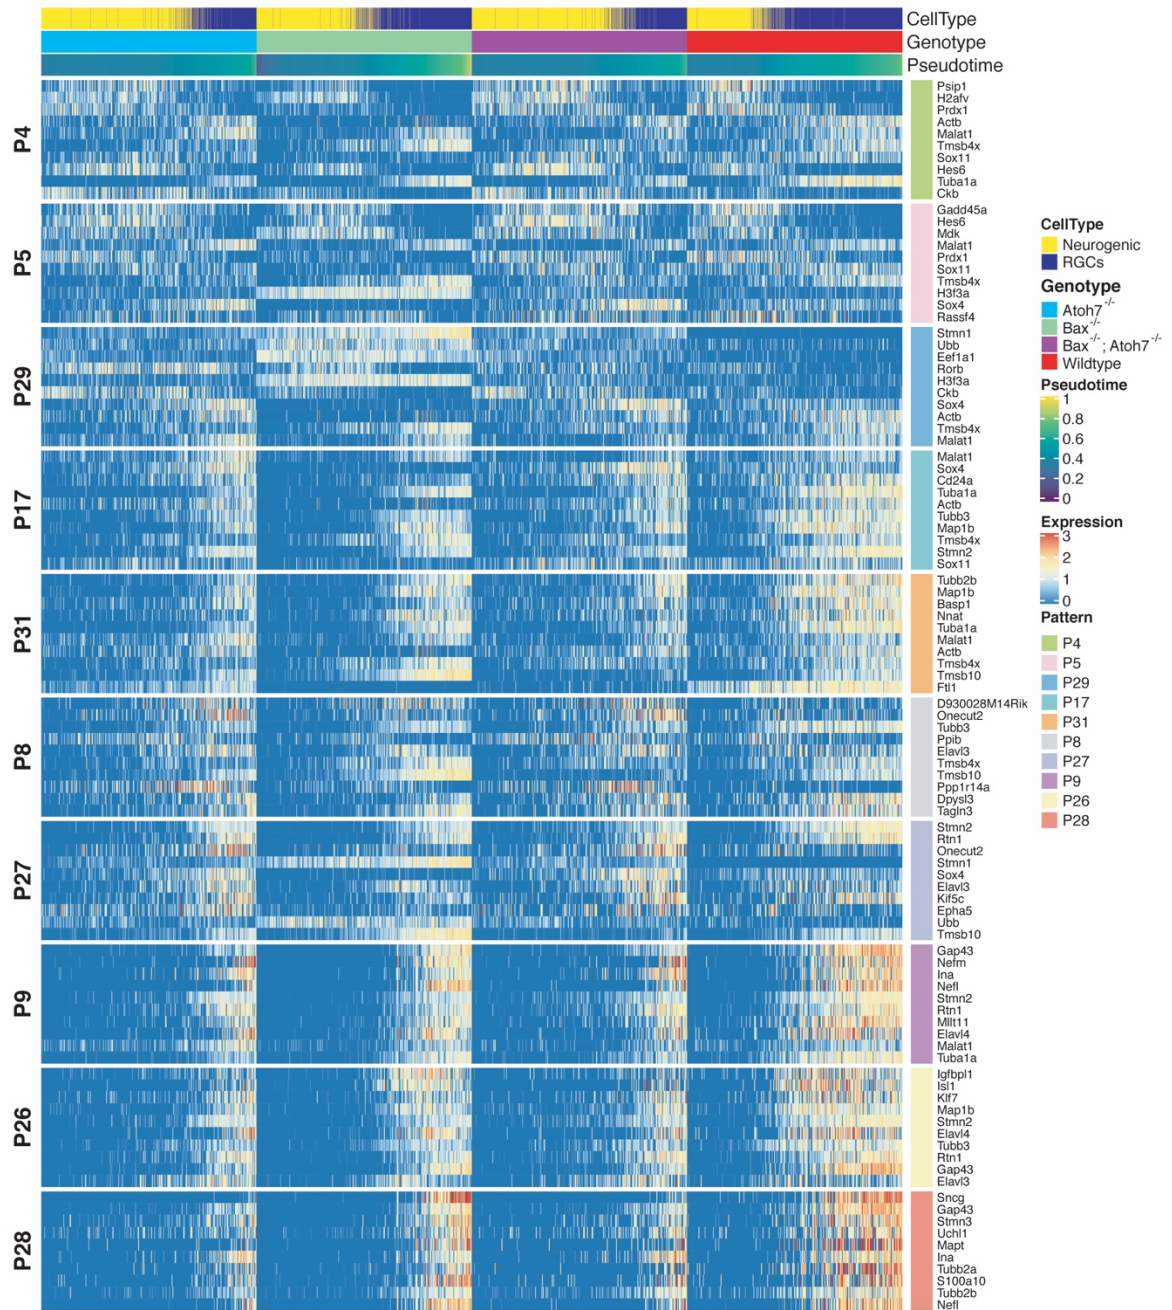

Supplemental Figure 10. Brodie-Kommit et al. 2020

A

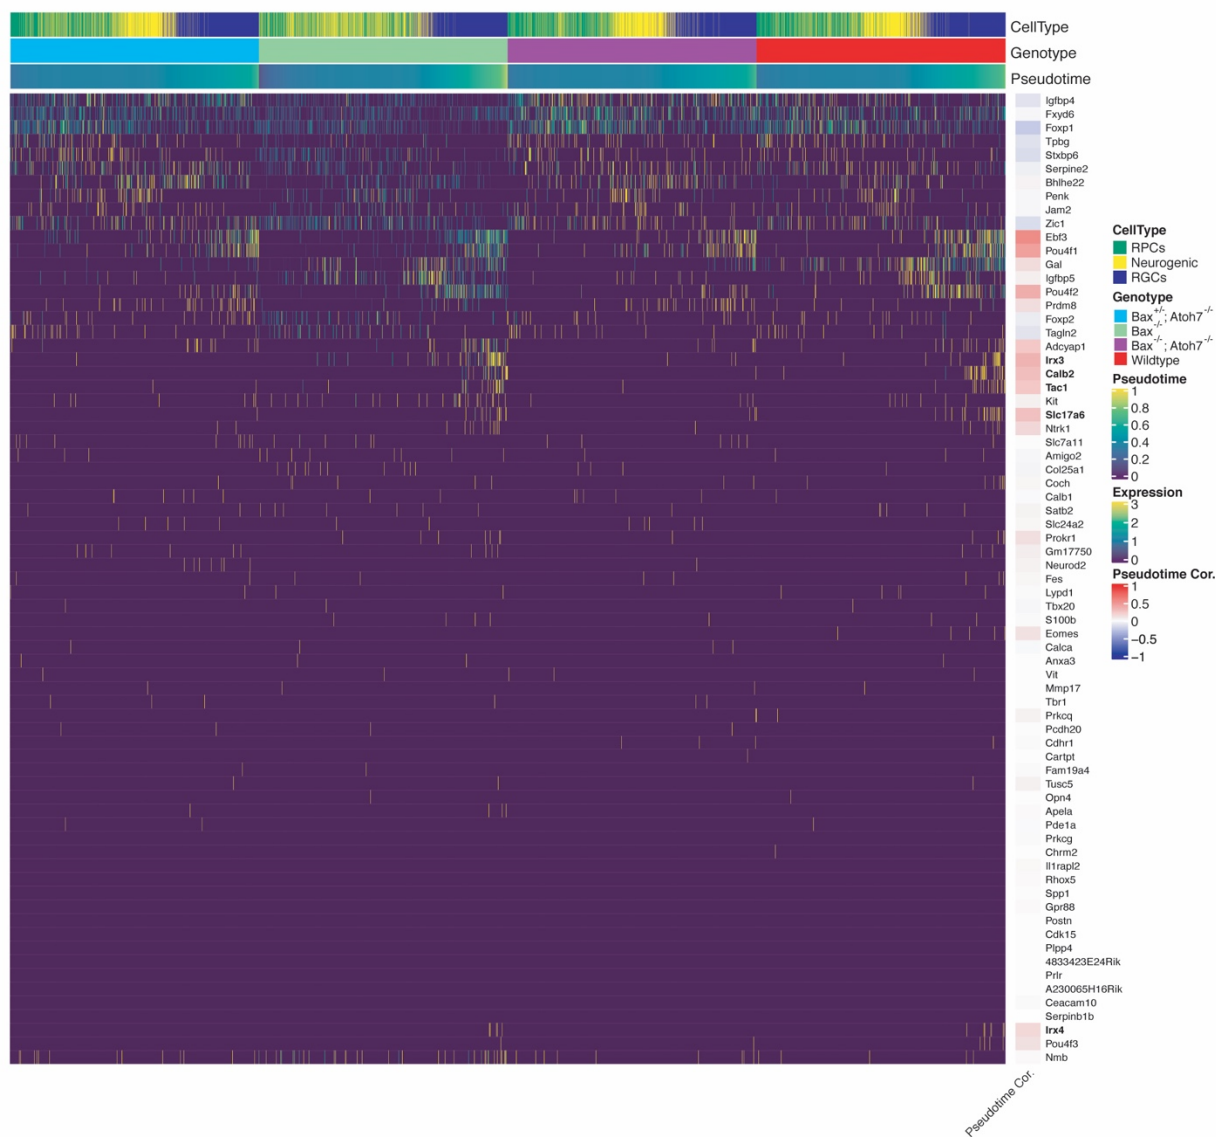

Supplemental Figure 11. Brodie-Kommit et al. 2020

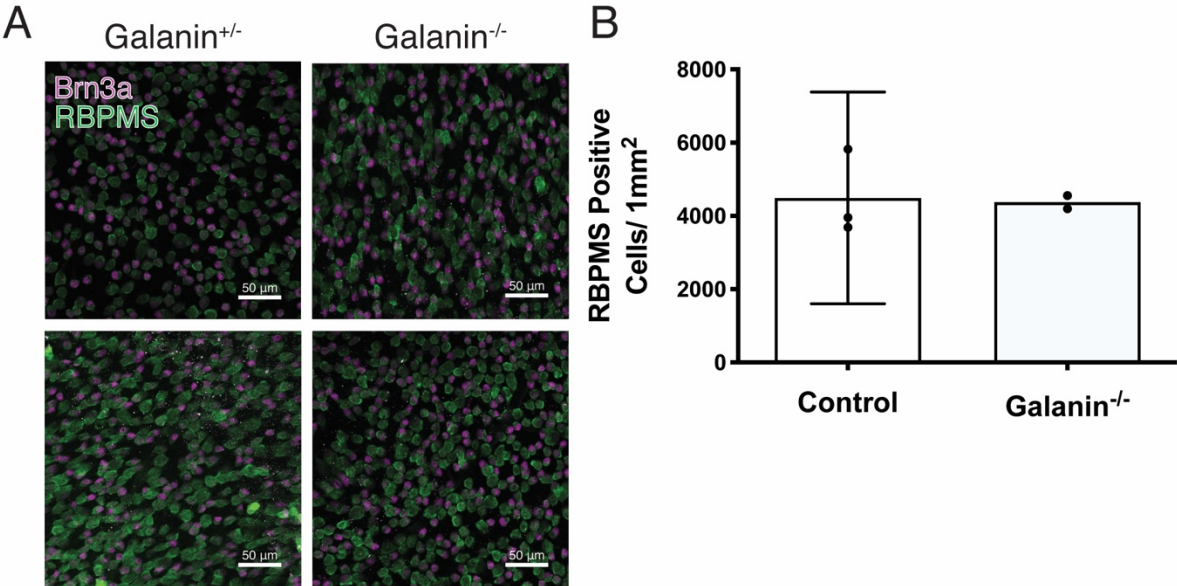

Supplemental Figure 12. Brodie-Kommit et al. 2020
